# Supplementary material for: Therapeutic Effects of Saponins for the Prevention and Treatment of Cancer by Ameliorating Inflammation and Angiogenesis and Inducing Antioxidant and Apoptotic Effects in Human Cells
Source: MDPI journal article supplement (doi:10.3390/ijms231810665), 2022-09-14
Supplement: s1 [file s1]



**theasaponin E1 (GTS E1)**



**theasaponin E3**



**theasaponin C1**



**theasaponin E2**



**theasaponin E4**



**theasaponin E5**



**theasaponin E6**



**theasaponin E7**



**theasaponin E8**



**theasaponin E9**



**theasaponin E10**



**theasaponin E11**



**theasaponin E12**



**theasaponin E13**



**theasaponin E14**

**assamsaponin A & B**

**Table S1. Theasaponin E1 NMR data**

| <b>5. <sup>13</sup>C-NMR data of 544-4 in pyridine-<i>d</i><sub>5</sub>.</b> |       |           |          |       |           |
|------------------------------------------------------------------------------|-------|-----------|----------|-------|-----------|
| Position                                                                     | 544-4 | reference | Position | 544-4 | reference |
| 1                                                                            | 38.5  | 38.3      | 1'       | 104.4 | 104.1     |
| 2                                                                            | 25.5  | 25.2      | 2'       | 78.6  | 78.4      |
| 3                                                                            | 84.8  | 84.5      | 3'       | 84.1  | 84.2      |
| 4                                                                            | 55.4  | 55.2      | 4'       | 71.2  | 70.8      |
| 5                                                                            | 48.7  | 48.4      | 5'       | 76.9  | 77.3      |
| 6                                                                            | 20.7  | 20.4      | 6''      | 171.3 | 171.8     |
| 7                                                                            | 32.7  | 32.5      | 1''      | 103.6 | 103.2     |
| 8                                                                            | 40.6  | 40.4      | 2''      | 74.0  | 73.7      |
| 9                                                                            | 47.1  | 46.8      | 3''      | 75.7  | 75.3      |
| 10                                                                           | 36.4  | 36.1      | 4''      | 70.8  | 70.5      |
| 11                                                                           | 24.1  | 23.8      | 5''      | 76.8  | 76.5      |
| 12                                                                           | 123.4 | 123.1     | 6''      | 62.4  | 62.1      |
| 13                                                                           | 143.3 | 142.9     | 1'''     | 102.0 | 101.7     |
| 14                                                                           | 42.0  | 41.8      | 2'''     | 82.3  | 82.3      |
| 15                                                                           | 34.9  | 34.6      | 3'''     | 73.8  | 73.4      |
| 16                                                                           | 68.2  | 68.1      | 4'''     | 68.7  | 68.4      |
| 17                                                                           | 48.3  | 48.0      | 5'''     | 66.5  | 66.1      |
| 18                                                                           | 40.4  | 40.2      | 1''''    | 107.4 | 107.0     |
| 19                                                                           | 47.5  | 47.2      | 2''''    | 76.3  | 75.9      |
| 20                                                                           | 36.6  | 36.3      | 3''''    | 78.5  | 78.2      |
| 21                                                                           | 79.2  | 78.9      | 4''''    | 70.8  | 70.8      |
| 22                                                                           | 74.6  | 74.5      | 5''''    | 68.0  | 67.5      |
| 23                                                                           | 210.3 | 209.8     | 1'''''   | 168.2 | 167.9     |
| 24                                                                           | 11.4  | 11.0      | 2'''''   | 129.3 | 129.0     |
| 25                                                                           | 16.1  | 15.8      | 3'''''   | 137.5 | 137.0     |
| 26                                                                           | 17.1  | 16.9      | 4'''''   | 16.3  | 15.9      |
| 27                                                                           | 27.7  | 27.4      | 5'''''   | 21.4  | 21.0      |
| 28                                                                           | 64.1  | 64.0      | 1'''''   | 170.4 | 171.1     |

|    |      |      |        |      |      |
|----|------|------|--------|------|------|
| 29 | 29.8 | 29.5 | 2''''' | 21.2 | 20.9 |
| 30 | 20.6 | 20.3 |        |      |      |

**Table S2. TheasaponinC1 NMR data**

| Table 6. <sup>13</sup> C-NMR data of 551G3-1 in pyridine- <i>d</i> <sub>5</sub> . |         |                                         |          |         |                                         |
|-----------------------------------------------------------------------------------|---------|-----------------------------------------|----------|---------|-----------------------------------------|
| Position                                                                          | 551G3-1 | Theasaponin C <sub>1</sub> <sup>a</sup> | Position | 551G3-1 | Theasaponin C <sub>1</sub> <sup>a</sup> |
| 1                                                                                 | 39.0    | 38.7                                    | 1'       | 104.4   | 104.1                                   |
| 2                                                                                 | 25.8    | 25.5                                    | 2'       | 78.8)   | 78.5                                    |
| 3                                                                                 | 83.3    | 83.1                                    | 3'       | 84.2    | 84.6                                    |
| 4                                                                                 | 43.8    | 43.5                                    | 4'       | 70.5    | 71.0                                    |
| 5                                                                                 | 48.4    | 48.2                                    | 5'       | 77.1    | 77.4                                    |
| 6                                                                                 | 18.4    | 18.2                                    | 6''      | 172.3   | 172.0                                   |
| 7                                                                                 | 33.1    | 32.8                                    | 1''      | 103.4   | 103.2                                   |
| 8                                                                                 | 40.4    | 40.1                                    | 2''      | 74.0    | 73.8                                    |
| 9                                                                                 | 47.3    | 47.0                                    | 3''      | 75.5    | 75.3                                    |
| 10                                                                                | 37.0    | 36.8                                    | 4''      | 70.4    | 70.1                                    |
| 11                                                                                | 24.1    | 23.9                                    | 5''      | 76.8    | 76.5                                    |
| 12                                                                                | 123.4   | 123.1                                   | 6''      | 62.2    | 61.9                                    |
| 13                                                                                | 144.0   | 143.7                                   | 1'''     | 101.9   | 101.7                                   |
| 14                                                                                | 41.9    | 41.6                                    | 2'''     | 82.6    | 82.3                                    |
| 15                                                                                | 35.4    | 35.2                                    | 3'''     | 73.7    | 73.4                                    |
| 16                                                                                | 70.4    | 70.1                                    | 4'''     | 68.6    | 68.3                                    |
| 17                                                                                | 45.1    | 44.8                                    | 5'''     | 66.9    | 66.6                                    |
| 18                                                                                | 41.2    | 40.9                                    | 1''''    | 107.3   | 107.1                                   |
| 19                                                                                | 47.7    | 47.4                                    | 2''''    | 76.2    | 75.9                                    |
| 20                                                                                | 32.3    | 32.1                                    | 3''''    | 78.5    | 78.3                                    |
| 21                                                                                | 42.0    | 41.7                                    | 4''''    | 71.1    | 70.8                                    |
| 22                                                                                | 73.3    | 73.0                                    | 5''''    | 67.8    | 67.5                                    |
| 23                                                                                | 65.1    | 64.8                                    | 1'''''   | 168.3   | 168.0                                   |
| 24                                                                                | 13.9    | 13.6                                    | 2'''''   | 129.8   | 129.5                                   |
| 25                                                                                | 16.5    | 16.2                                    | 3'''''   | 136.9   | 136.6                                   |
| 26                                                                                | 17.2    | 16.9                                    | 4'''''   | 16.2    | 15.9                                    |
| 27                                                                                | 27.9    | 27.6                                    | 5'''''   | 21.3    | 21.0                                    |
| 28                                                                                | 63.9    | 63.6                                    |          |         |                                         |
| 29                                                                                | 33.7    | 33.5                                    |          |         |                                         |
| 30                                                                                | 25.5    | 25.2                                    |          |         |                                         |

**Table S3. Theasaponin E3 NMR data**

| Table 4. <sup>13</sup> C-NMR data of 544-3 in pyridine- <i>d</i> <sub>5</sub> |  |  |  |  |  |
|-------------------------------------------------------------------------------|--|--|--|--|--|
|-------------------------------------------------------------------------------|--|--|--|--|--|

| Position | 544-3 | Theasaponin<br>E <sub>3</sub> <sup>a</sup> | Position | 544-3 | Theasaponin<br>E <sub>3</sub> <sup>a</sup> |
|----------|-------|--------------------------------------------|----------|-------|--------------------------------------------|
| 1        | 38.5  | 38.2                                       | 1'       | 104.5 | 104.2                                      |
| 2        | 25.6  | 25.3                                       | 2'       | 78.5  | 78.3                                       |
| 3        | 84.4  | 84.1                                       | 3'       | 84.9  | 84.5                                       |
| 4        | 55.5  | 55.2                                       | 4'       | 71.4  | 70.8                                       |
| 5        | 48.7  | 48.2                                       | 5'       | 77.5  | 77.3                                       |
| 6        | 20.7  | 20.4                                       | 6''      | 171.1 | 172.0                                      |
| 7        | 32.7  | 32.4                                       | 1''      | 103.6 | 103.3                                      |
| 8        | 40.6  | 40.3                                       | 2''      | 74.0  | 73.7                                       |
| 9        | 47.1  | 46.9                                       | 3''      | 75.7  | 75.4                                       |
| 10       | 36.4  | 36.2                                       | 4''      | 70.8  | 70.4                                       |
| 11       | 24.1  | 23.8                                       | 5''      | 76.9  | 76.5                                       |
| 12       | 123.4 | 123.1                                      | 6''      | 62.4  | 62.1                                       |
| 13       | 143.1 | 143.6                                      | 1'''     | 101.9 | 101.7                                      |
| 14       | 42.1  | 41.9                                       | 2'''     | 82.3  | 82.4                                       |
| 15       | 34.9  | 34.4                                       | 3'''     | 73.7  | 73.4                                       |
| 16       | 68.2  | 67.8                                       | 4'''     | 68.6  | 68.3                                       |
| 17       | 47.6  | 47.8                                       | 5'''     | 66.7  | 66.6                                       |
| 18       | 40.8  | 40.5                                       | 1''''    | 107.4 | 107.1                                      |
| 19       | 47.4  | 47.0                                       | 2''''    | 75.7  | 75.9                                       |
| 20       | 36.3  | 36.1                                       | 3''''    | 78.5  | 78.3                                       |
| 21       | 81.5  | 81.7                                       | 4''''    | 71.1  | 70.8                                       |
| 22       | 73.6  | 73.1                                       | 5''''    | 67.8  | 67.5                                       |
| 23       | 210.4 | 209.9                                      | 1'''''   | 168.9 | 168.7                                      |
| 24       | 11.4  | 11.1                                       | 2'''''   | 129.8 | 129.6                                      |
| 25       | 16.1  | 15.8                                       | 3'''''   | 136.3 | 136.0                                      |
| 26       | 17.3  | 16.9                                       | 4'''''   | 16.2  | 15.9                                       |
| 27       | 27.7  | 27.4                                       | 5'''''   | 21.4  | 21.1                                       |
| 28       | 66.3  | 66.0                                       | 1'''''   | 64.3  | 64.5                                       |
| 29       | 30.1  | 29.9                                       |          |       |                                            |
| 30       | 20.6  | 20.4                                       |          |       |                                            |

**Table S4.**NMR data of Assamsaponin A and Assamsaponin B

| Assamsaponin A   |                     | Assamsaponin B   |                     |
|------------------|---------------------|------------------|---------------------|
| $\delta_C$ (ppm) | $\delta_H$ (ppm, J) | $\delta_C$ (ppm) | $\delta_H$ (ppm, J) |
| 37.9             | 1.53 (m)            | 37.5             | 1.53(m)             |
| 23.6             | 1.51 (m)            | 24.6             | 1.48 (m)            |
| 81.3             | 3.62 (m)            | 73.4             | 3.59 (m)            |
| 21.0             |                     | 22.3             |                     |
| 48.2             | 1.25 (m)            | 41.4             | 1.22 (m)            |
| 19.6             | 1.37 (m)            | 18.6             | 1.31 (m)            |
| 31.4             | 1.45 (m)            | 30.5             | 1.45 (m)            |
| 39.3             |                     | 35.2             |                     |
| 45.7             | 1.57(m)             | 41.7             | 1.59 (m)            |
| 35.1             |                     | 34.6             |                     |
| 22.7             | 1.62 (m)            | 23.8             | 1.61 (m)            |
| 122.4            | 5.11 (br s)         | 120.4            | 5.18 (m)            |
| 140.8            |                     | 140.2            |                     |
| 40.3             |                     | 40.2             |                     |
| 31.3             | 1.49 (m)            | 31.6             | 1.33 (m)            |
| 15.4             | 0.82 (s)            | 15.0             | 0.84 (s)            |
| 14.3             | 0.81 (s)            | 15.0             | 0.83 (s)            |
| 25.9             | 1.32 (s)            | 24.3             | 1.37 (s)            |
| 62.8             | 3.6 (m),            | 62.3             | 3.1 (m)             |
| 33.4             | 1.85 (s)            | 31.4             | 1.84 (s)            |
| 24.3             | 2.96 (s)            | 23.9             | 2.0 (s)             |
|                  |                     |                  |                     |
| 101.3            | 4.1(br s)           | 101.3            | 4.16 (br s)         |
| 73.7             | 3.41 (m)            | 73.6             | 3.46 (m)            |
| 59.2             | 2.51(m)             | 59.3             | 3.58 (m)            |
| 79.4             | 2.62(m)             | 78.2             | 3.60(m)             |

|       |             |       |                |
|-------|-------------|-------|----------------|
| 65.8  | 3.61 (m)    | 62.2  | 3.65 (m)       |
| 171.1 |             | 171.2 |                |
|       |             |       |                |
| 101.7 | 4.31 (m)    | 101.5 | 4.30(m)        |
| 71.4  | 3.11 (m)    | 73.5  | 3.09(m)        |
| 73.5  | 3.26 (m)    | 69.7  | 3.29(m)        |
| 68.1  | 3.45 (m)    | 68.1  | 3.42(m)        |
| 74.6  | 3.31(m)     | 72.3  | 3.37(m)        |
| 59.8  | 3.56(m)     | 60.2  | 3.47 (m)       |
|       |             |       |                |
|       |             |       |                |
| 69.3  | 3.29 (m)    | 75.1  | 3.32 (m)       |
| 74.6  | 3.37 (m)    | 73.6  | 3.37 (m)       |
| 69.5  | 3.47 (m)    | 69.3  | 3.47 (m)       |
| 81.6  | 3.58 (m)    | 81.7  | 3.52 (m)       |
|       |             |       |                |
| 104.6 | 4.29 (br s) | 104.1 | 4.32 (d, 7.27) |
| 69.3  | 3.29 (m)    | 69.8  | 3.78(m)        |
| 76.4  | 3.10 (m)    | 76.7  | 3.67(m)        |
| 73.8  | 3.00 (m)    | 73.2  | 3.45(m)        |
| 65.7  | 3.06 (m)    | 65.7  | 3.19 (m)       |
|       |             |       |                |
| 165.4 |             | 165.3 |                |
| 126.3 |             | 126.9 |                |
| 112.4 | 5.01 (dq)   | 112.5 | 6.08 (dq)      |
| 12.3  | 1.89(m)     | 12.7  | 1.89(m)        |
| 25.3  | 1.79(s)     | 25.3  | 1.78 (s)       |
|       |             |       |                |
