# Supplementary material for: Therapeutic Effects of Saponins for the Prevention and Treatment of Cancer by Ameliorating Inflammation and Angiogenesis and Inducing Antioxidant and Apoptotic Effects in Human Cells
Source: MDPI journal article supplement (doi:10.3390/ijms231810665), 2022-09-14
Supplement: s1 [file s1]

## SPECTRUM - MS

Acid-hydrolyzed-saponin.RAW

- c ESI sid=10.00 Q1MS [500.000-1500.000]

Scan #: 1397-4047

RT: 12.44-36.06

AV: 2651

| m/z      | Intensity | Relative |
|----------|-----------|----------|
| 500.0736 | 0.4       | 0        |
| 500.741  | 1140.2    | 1.77     |
| 501.8029 | 716.4     | 1.11     |
| 502.8096 | 926.9     | 1.44     |
| 503.6625 | 366.6     | 0.57     |
| 504.5367 | 602.2     | 0.93     |
| 505.1422 | 554.4     | 0.86     |
| 506.0286 | 534.5     | 0.83     |
| 506.8238 | 596.9     | 0.92     |
| 507.5253 | 411       | 0.64     |
| 508.4515 | 716.7     | 1.11     |
| 509.1575 | 763.1     | 1.18     |
| 510.114  | 706.4     | 1.09     |
| 510.9851 | 751.4     | 1.16     |
| 511.7963 | 430.2     | 0.67     |
| 512.6928 | 767.6     | 1.19     |
| 513.224  | 653.2     | 1.01     |
| 514.1427 | 513.8     | 0.8      |
| 514.9738 | 1213.8    | 1.88     |
| 515.9548 | 653.2     | 1.01     |
| 516.8897 | 820       | 1.27     |
| 517.6254 | 368.6     | 0.57     |
| 518.5786 | 694.6     | 1.08     |
| 519.2082 | 623.6     | 0.97     |
| 520.154  | 809.4     | 1.25     |
| 520.9672 | 823.9     | 1.28     |
| 521.9173 | 535.4     | 0.83     |
| 522.9651 | 1715.3    | 2.66     |
| 523.6426 | 649.6     | 1.01     |
| 524.502  | 960.9     | 1.49     |
| 525.2253 | 741.4     | 1.15     |
| 526.3338 | 805.2     | 1.25     |
| 527.1133 | 1235.3    | 1.91     |
| 528.1584 | 777.4     | 1.2      |
| 529.0404 | 901.1     | 1.4      |
| 529.9582 | 558       | 0.86     |
| 530.9678 | 1231.4    | 1.91     |
| 532.0649 | 746.9     | 1.16     |
| 533.0484 | 1106      | 1.71     |
| 533.9666 | 601.4     | 0.93     |
| 535.0694 | 1602.8    | 2.48     |
| 536.2041 | 885.2     | 1.37     |

**Percentage composition of the s:**

Theasaponin E1(44%)

Theasaponin E3 (15%)

Theasaponin C (10%)

Assamsaponin B (9%)

Theasaponin A1(5%)

Assamsaponin A (4%)

Theasaponin A3 (2%)

|          |        |      |
|----------|--------|------|
| 537.1655 | 755.1  | 1.17 |
| 538.2501 | 823.7  | 1.28 |
| 539.1274 | 1619.5 | 2.51 |
| 540.2134 | 929.9  | 1.44 |
| 541.0997 | 1350.2 | 2.09 |
| 541.7499 | 372.8  | 0.58 |
| 542.6727 | 1175.3 | 1.82 |
| 543.6776 | 770.1  | 1.19 |
| 544.3045 | 2.2    | 0    |
| 544.8793 | 1258.5 | 1.95 |
| 545.999  | 778.8  | 1.21 |
| 547.0239 | 880.5  | 1.36 |
| 548.1405 | 571.9  | 0.89 |
| 549.1602 | 4816.1 | 7.46 |
| 550.2074 | 1816.5 | 2.81 |
| 551.1345 | 3119.3 | 4.83 |
| 552.146  | 1227.5 | 1.9  |
| 552.9313 | 665.5  | 1.03 |
| 553.6632 | 408.5  | 0.63 |
| 554.5862 | 552.3  | 0.86 |
| 555.2847 | 441.7  | 0.68 |
| 556.1717 | 472.2  | 0.73 |
| 556.9276 | 779.8  | 1.21 |
| 557.9416 | 590.5  | 0.91 |
| 558.9058 | 1194.4 | 1.85 |
| 559.8465 | 666.6  | 1.03 |
| 560.8132 | 890.8  | 1.38 |
| 561.5296 | 465.8  | 0.72 |
| 562.4952 | 753.3  | 1.17 |
| 563.2993 | 646.9  | 1    |
| 563.9071 | 0.7    | 0    |
| 564.5348 | 861.8  | 1.34 |
| 565.4669 | 547.7  | 0.85 |
| 566.374  | 817.7  | 1.27 |
| 567.1923 | 666.4  | 1.03 |
| 568.1232 | 549.7  | 0.85 |
| 568.9767 | 868.1  | 1.34 |
| 569.8602 | 449    | 0.7  |
| 570.8249 | 937.3  | 1.45 |
| 571.6871 | 428.7  | 0.66 |
| 572.5221 | 731.5  | 1.13 |
| 573.2181 | 700.3  | 1.08 |
| 574.2488 | 847    | 1.31 |
| 575.1242 | 704.8  | 1.09 |
| 576.059  | 508.8  | 0.79 |
| 577.0042 | 858.7  | 1.33 |
| 577.8909 | 447.3  | 0.69 |
| 578.4245 | 0.4    | 0    |
| 579.0048 | 1696.4 | 2.63 |
| 580.1656 | 989.3  | 1.53 |
| 581.0408 | 1142.9 | 1.77 |
| 581.8597 | 493.2  | 0.76 |

|          |        |      |
|----------|--------|------|
| 582.6625 | 765.7  | 1.19 |
| 583.2863 | 667.4  | 1.03 |
| 584.3413 | 782.6  | 1.21 |
| 585.1449 | 894.7  | 1.39 |
| 586.1753 | 689.5  | 1.07 |
| 587.1265 | 1125   | 1.74 |
| 588.154  | 758.6  | 1.18 |
| 589.0495 | 774.7  | 1.2  |
| 590.0468 | 565.1  | 0.88 |
| 591.071  | 1787.9 | 2.77 |
| 592.1027 | 959.9  | 1.49 |
| 593.0959 | 1404.3 | 2.18 |
| 594.161  | 971.3  | 1.5  |
| 595.1155 | 1085.8 | 1.68 |
| 596.1421 | 668.1  | 1.04 |
| 597.1068 | 968.2  | 1.5  |
| 598.1869 | 753.2  | 1.17 |
| 599.0324 | 1183.3 | 1.83 |
| 599.9025 | 588    | 0.91 |
| 600.8424 | 894.9  | 1.39 |
| 601.5987 | 481.1  | 0.75 |
| 602.4593 | 637.6  | 0.99 |
| 603.1604 | 823.2  | 1.28 |
| 604.1529 | 630.8  | 0.98 |
| 605.0389 | 860.2  | 1.33 |
| 606.0062 | 611.9  | 0.95 |
| 606.9495 | 1017.4 | 1.58 |
| 607.7318 | 523.6  | 0.81 |
| 608.6442 | 801    | 1.24 |
| 609.3264 | 601.7  | 0.93 |
| 610.1751 | 621.8  | 0.96 |
| 610.9948 | 629.5  | 0.98 |
| 611.6785 | 363.4  | 0.56 |
| 612.5649 | 629.3  | 0.97 |
| 613.1808 | 612.4  | 0.95 |
| 614.069  | 547.4  | 0.85 |
| 615.013  | 917.6  | 1.42 |
| 615.9384 | 562.8  | 0.87 |
| 616.4733 | 3.3    | 0.01 |
| 617.0664 | 2548.6 | 3.95 |
| 617.7625 | 658.7  | 1.02 |
| 618.4039 | 947.5  | 1.47 |
| 619.1839 | 1028.5 | 1.59 |
| 619.9704 | 516.4  | 0.8  |
| 621.0931 | 3290.4 | 5.1  |
| 621.7391 | 4      | 0.01 |
| 622.2455 | 1587   | 2.46 |
| 623.1812 | 3378.2 | 5.23 |
| 623.7053 | 0.1    | 0    |
| 624.2221 | 1548.1 | 2.4  |
| 625.1199 | 1223.8 | 1.9  |
| 625.9452 | 607.5  | 0.94 |

|          |         |       |
|----------|---------|-------|
| 626.9099 | 814.3   | 1.26  |
| 627.9236 | 540.4   | 0.84  |
| 628.9357 | 851     | 1.32  |
| 629.9975 | 653.4   | 1.01  |
| 631.1714 | 16608.3 | 25.73 |
| 631.6879 | 0       | 0     |
| 632.2422 | 5903.6  | 9.15  |
| 633.1901 | 10905.4 | 16.9  |
| 634.2369 | 4070.4  | 6.31  |
| 635.2101 | 1457.6  | 2.26  |
| 635.9342 | 482.4   | 0.75  |
| 636.7661 | 893.6   | 1.38  |
| 637.4263 | 515.3   | 0.8   |
| 638.2378 | 538.6   | 0.83  |
| 639.0924 | 813.3   | 1.26  |
| 640.1535 | 636     | 0.99  |
| 641.0792 | 630     | 0.98  |
| 642.0827 | 484.2   | 0.75  |
| 642.9754 | 691.1   | 1.07  |
| 643.8161 | 556.9   | 0.86  |
| 644.806  | 1295    | 2.01  |
| 645.6192 | 796.4   | 1.23  |
| 646.744  | 1479.3  | 2.29  |
| 647.3904 | 2.7     | 0     |
| 647.9384 | 1060.2  | 1.64  |
| 648.996  | 1054.1  | 1.63  |
| 649.9925 | 682.5   | 1.06  |
| 650.9309 | 1191.8  | 1.85  |
| 651.68   | 612.4   | 0.95  |
| 652.6997 | 1246.2  | 1.93  |
| 653.6315 | 901.3   | 1.4   |
| 654.7067 | 857.6   | 1.33  |
| 655.5592 | 515.2   | 0.8   |
| 656.5034 | 650.1   | 1.01  |
| 657.1848 | 627.8   | 0.97  |
| 658.054  | 523.2   | 0.81  |
| 659.0434 | 1364.3  | 2.11  |
| 659.9947 | 864.5   | 1.34  |
| 660.5721 | 0.1     | 0     |
| 661.0909 | 2820.3  | 4.37  |
| 662.0859 | 1600    | 2.48  |
| 662.9533 | 1531.8  | 2.37  |
| 663.5057 | 593.8   | 0.92  |
| 664.2809 | 758.3   | 1.17  |
| 665.0904 | 1724.4  | 2.67  |
| 666.0582 | 1020.3  | 1.58  |
| 667.0144 | 1574.2  | 2.44  |
| 667.9757 | 853.3   | 1.32  |
| 668.9448 | 1041.5  | 1.61  |
| 669.847  | 667.7   | 1.03  |
| 670.8759 | 1348.4  | 2.09  |
| 671.6786 | 662.3   | 1.03  |

|          |        |      |
|----------|--------|------|
| 672.6653 | 1092.1 | 1.69 |
| 673.2882 | 1881.4 | 2.91 |
| 674.0688 | 26.7   | 0.04 |
| 674.6392 | 2593.5 | 4.02 |
| 675.3098 | 2486.6 | 3.85 |
| 675.9619 | 4.9    | 0.01 |
| 676.5325 | 2217.4 | 3.44 |
| 677.3866 | 971.5  | 1.51 |
| 678.2897 | 789.3  | 1.22 |
| 679.1601 | 4640.7 | 7.19 |
| 680.1854 | 2207.5 | 3.42 |
| 681.0743 | 2390.9 | 3.7  |
| 682.0421 | 1144   | 1.77 |
| 682.8683 | 868.7  | 1.35 |
| 683.6073 | 565.4  | 0.88 |
| 684.2422 | 2.2    | 0    |
| 684.7976 | 1215.6 | 1.88 |
| 685.7055 | 711.3  | 1.1  |
| 686.763  | 967.8  | 1.5  |
| 687.3163 | 0.7    | 0    |
| 687.8356 | 1072.1 | 1.66 |
| 688.4592 | 1205   | 1.87 |
| 689.2388 | 1196   | 1.85 |
| 690.207  | 3150.7 | 4.88 |
| 691.1347 | 2376.2 | 3.68 |
| 692.1243 | 1123.1 | 1.74 |
| 693.0862 | 1003.4 | 1.55 |
| 694.0062 | 563.1  | 0.87 |
| 694.7937 | 823.9  | 1.28 |
| 695.3873 | 706.3  | 1.09 |
| 696.2355 | 680.3  | 1.05 |
| 697.0844 | 973.7  | 1.51 |
| 697.9712 | 635.9  | 0.99 |
| 699.0349 | 2603.5 | 4.03 |
| 699.9899 | 1291.5 | 2    |
| 700.6309 | 820    | 1.27 |
| 701.2183 | 1554.2 | 2.41 |
| 702.2473 | 6363.6 | 9.86 |
| 703.2016 | 3352.5 | 5.19 |
| 704.1042 | 1258.9 | 1.95 |
| 705.02   | 1408.4 | 2.18 |
| 706.0861 | 1001.5 | 1.55 |
| 707.0848 | 1752.5 | 2.72 |
| 708.0956 | 1077.9 | 1.67 |
| 709.0624 | 2126.6 | 3.29 |
| 709.9123 | 925.6  | 1.43 |
| 710.7114 | 1004.2 | 1.56 |
| 711.4447 | 729.2  | 1.13 |
| 712.4525 | 719    | 1.11 |
| 713.1584 | 1129.8 | 1.75 |
| 714.2202 | 3586.3 | 5.56 |
| 715.1527 | 2268.1 | 3.51 |

|          |         |       |
|----------|---------|-------|
| 716.2893 | 36180.8 | 56.05 |
| 717.3215 | 15376.8 | 23.82 |
| 718.3594 | 4354    | 6.75  |
| 719.2461 | 1386.1  | 2.15  |
| 719.8627 | 553.2   | 0.86  |
| 720.4624 | 3.7     | 0.01  |
| 721.0778 | 3428.5  | 5.31  |
| 721.6177 | 0       | 0     |
| 722.1955 | 1651.9  | 2.56  |
| 723.1901 | 2199.5  | 3.41  |
| 723.7009 | 0.9     | 0     |
| 724.2409 | 1247.5  | 1.93  |
| 725.1605 | 5657.6  | 8.76  |
| 726.2208 | 2320.8  | 3.6   |
| 727.0958 | 1415.5  | 2.19  |
| 728.2753 | 9971.2  | 15.45 |
| 729.3113 | 7432.7  | 11.51 |
| 730.367  | 5605.3  | 8.68  |
| 731.2763 | 3145.9  | 4.87  |
| 732.0638 | 1389    | 2.15  |
| 732.8446 | 1218.8  | 1.89  |
| 733.7121 | 897.5   | 1.39  |
| 734.5738 | 1106.6  | 1.71  |
| 735.3758 | 721.8   | 1.12  |
| 736.2559 | 815.2   | 1.26  |
| 737.0364 | 977.4   | 1.51  |
| 737.9355 | 893.4   | 1.38  |
| 738.6357 | 5.9     | 0.01  |
| 739.1722 | 13135.2 | 20.35 |
| 739.7199 | 0.4     | 0     |
| 740.2794 | 4763.4  | 7.38  |
| 741.2249 | 1771.9  | 2.75  |
| 741.7277 | 0.3     | 0     |
| 742.2374 | 2874.2  | 4.45  |
| 743.1053 | 2538.1  | 3.93  |
| 744.0316 | 1249.4  | 1.94  |
| 745.1395 | 4481.1  | 6.94  |
| 745.6926 | 0.5     | 0     |
| 746.2001 | 2069.9  | 3.21  |
| 746.7137 | 0.4     | 0     |
| 747.2324 | 5780    | 8.95  |
| 748.304  | 3252.7  | 5.04  |
| 749.3127 | 1794.8  | 2.78  |
| 750.2806 | 1007.5  | 1.56  |
| 751.116  | 948.3   | 1.47  |
| 752.0675 | 1343.8  | 2.08  |
| 753.0399 | 1482    | 2.3   |
| 754.1164 | 1157.1  | 1.79  |
| 755.0987 | 1579.4  | 2.45  |
| 756.1565 | 1307.8  | 2.03  |
| 757.1402 | 1439    | 2.23  |
| 758.1621 | 1100.4  | 1.7   |

|          |         |       |
|----------|---------|-------|
| 759.0956 | 2210.7  | 3.42  |
| 760.1391 | 1312.9  | 2.03  |
| 761.2587 | 42959.1 | 66.55 |
| 762.2342 | 23157.4 | 35.88 |
| 763.327  | 6187.4  | 9.59  |
| 764.3895 | 2203.6  | 3.41  |
| 765.3125 | 1288.8  | 2     |
| 766.3397 | 996.2   | 1.54  |
| 767.1264 | 2619    | 4.06  |
| 768.0355 | 1802.6  | 2.79  |
| 769.0924 | 3682.4  | 5.7   |
| 770.2746 | 2054.2  | 3.18  |
| 771.1949 | 1661.3  | 2.57  |
| 772.3051 | 1378.1  | 2.14  |
| 773.2363 | 1606.6  | 2.49  |
| 774.2527 | 2809.5  | 4.35  |
| 775.174  | 2607.8  | 4.04  |
| 776.2095 | 3600.7  | 5.58  |
| 777.1981 | 2377.1  | 3.68  |
| 778.2453 | 1708.1  | 2.65  |
| 779.2308 | 2455.5  | 3.8   |
| 780.2434 | 1396.6  | 2.16  |
| 781.1624 | 5071.7  | 7.86  |
| 782.2353 | 3006.4  | 4.66  |
| 783.2603 | 1940.2  | 3.01  |
| 784.2479 | 4336.1  | 6.72  |
| 785.2148 | 2739.3  | 4.24  |
| 786.2317 | 1557.1  | 2.41  |
| 787.0419 | 1354.1  | 2.1   |
| 787.7922 | 991.2   | 1.54  |
| 788.6861 | 1529    | 2.37  |
| 789.3236 | 1317.4  | 2.04  |
| 790.3102 | 2157.1  | 3.34  |
| 791.1983 | 10267.3 | 15.91 |
| 792.1998 | 5009.8  | 7.76  |
| 793.2094 | 3161.3  | 4.9   |
| 794.2987 | 1872.3  | 2.9   |
| 795.2422 | 4850.4  | 7.51  |
| 796.2187 | 2655.8  | 4.11  |
| 797.1199 | 8617.7  | 13.35 |
| 798.1855 | 4957.7  | 7.68  |
| 798.6967 | 0.7     | 0     |
| 799.2135 | 3986.2  | 6.18  |
| 800.2794 | 2270.1  | 3.52  |
| 801.3468 | 1790.4  | 2.77  |
| 802.4035 | 1642.6  | 2.54  |
| 803.2054 | 7962.9  | 12.34 |
| 804.2759 | 6527.7  | 10.11 |
| 805.2316 | 12864.8 | 19.93 |
| 806.2554 | 4942.8  | 7.66  |
| 807.1844 | 37736.7 | 58.46 |
| 808.2838 | 15592.9 | 24.16 |

|          |         |       |
|----------|---------|-------|
| 809.3259 | 5651.3  | 8.76  |
| 810.4735 | 2505.8  | 3.88  |
| 811.1731 | 11030   | 17.09 |
| 812.3346 | 7239.7  | 11.22 |
| 813.2625 | 5933.6  | 9.19  |
| 814.2573 | 3166.4  | 4.91  |
| 815.19   | 1991.3  | 3.08  |
| 816.1189 | 2181.1  | 3.38  |
| 817.0278 | 2412.1  | 3.74  |
| 818.102  | 1673.4  | 2.59  |
| 819.0578 | 3946.7  | 6.11  |
| 819.8978 | 1785.4  | 2.77  |
| 820.7004 | 575.6   | 0.89  |
| 821.2198 | 64548.1 | 100   |
| 822.3177 | 27132.4 | 42.03 |
| 823.3293 | 8373.8  | 12.97 |
| 824.3249 | 3994.7  | 6.19  |
| 825.1777 | 2562.8  | 3.97  |
| 826.0757 | 1832.7  | 2.84  |
| 827.082  | 3104.5  | 4.81  |
| 827.6013 | 0.1     | 0     |
| 828.1592 | 1733    | 2.68  |
| 829.1468 | 6103.5  | 9.46  |
| 830.1846 | 4031.9  | 6.25  |
| 831.2337 | 2235    | 3.46  |
| 832.4471 | 2004.2  | 3.11  |
| 833.4587 | 1479.8  | 2.29  |
| 834.5124 | 1123.2  | 1.74  |
| 835.1586 | 3500.4  | 5.42  |
| 836.187  | 2622.2  | 4.06  |
| 837.1484 | 5727.7  | 8.87  |
| 838.2472 | 4214.5  | 6.53  |
| 839.2235 | 4440    | 6.88  |
| 840.1912 | 1845.7  | 2.86  |
| 840.9735 | 3311.1  | 5.13  |
| 841.5502 | 1589.3  | 2.46  |
| 842.4569 | 2639.1  | 4.09  |
| 843.2932 | 2179.4  | 3.38  |
| 844.2198 | 1683    | 2.61  |
| 845.0862 | 1864.4  | 2.89  |
| 845.9639 | 1814.8  | 2.81  |
| 846.9146 | 2282    | 3.54  |
| 847.9296 | 1492.2  | 2.31  |
| 848.564  | 8.2     | 0.01  |
| 849.1546 | 10753.5 | 16.66 |
| 850.2592 | 6078.9  | 9.42  |
| 851.1968 | 10115.6 | 15.67 |
| 852.2292 | 5282.7  | 8.18  |
| 853.1042 | 5916.7  | 9.17  |
| 853.9981 | 3032.9  | 4.7   |
| 855.0559 | 5184.8  | 8.03  |
| 856.0741 | 2491.6  | 3.86  |



|          |         |       |
|----------|---------|-------|
| 857.021  | 2229    | 3.45  |
| 857.9295 | 1298.9  | 2.01  |
| 859.004  | 2923.3  | 4.53  |
| 860.0209 | 1708.6  | 2.65  |
| 860.9551 | 2120.1  | 3.28  |
| 861.8522 | 1281    | 1.98  |
| 862.6659 | 234.3   | 0.36  |
| 863.1941 | 20626.2 | 31.95 |
| 863.717  | 0.9     | 0     |
| 864.2744 | 10195.7 | 15.8  |
| 865.3144 | 5028.5  | 7.79  |
| 866.4824 | 2671.1  | 4.14  |
| 867.2063 | 4187.6  | 6.49  |
| 868.2302 | 3240.2  | 5.02  |
| 869.2534 | 2302.1  | 3.57  |
| 869.7649 | 0.2     | 0     |
| 870.3232 | 1583.5  | 2.45  |
| 871.1464 | 2542.6  | 3.94  |
| 872.1468 | 2050    | 3.18  |
| 873.1062 | 2996.2  | 4.64  |
| 874.0273 | 1636.8  | 2.54  |
| 875.0815 | 3856.1  | 5.97  |
| 876.1726 | 2438.4  | 3.78  |
| 877.1975 | 2660.9  | 4.12  |
| 878.2622 | 1788.7  | 2.77  |
| 879.1315 | 3095.7  | 4.8   |
| 880.2169 | 2822.5  | 4.37  |
| 881.1543 | 2394.1  | 3.71  |
| 882.0349 | 1531.7  | 2.37  |
| 882.8617 | 1604    | 2.48  |
| 883.6203 | 1013.3  | 1.57  |
| 884.5423 | 1546.6  | 2.4   |
| 885.4523 | 1295.2  | 2.01  |
| 886.5012 | 1416.4  | 2.19  |
| 887.1471 | 1331.8  | 2.06  |
| 888.0405 | 1161.8  | 1.8   |
| 888.5899 | 0.7     | 0     |
| 889.1419 | 7666.5  | 11.88 |
| 890.2018 | 3864.3  | 5.99  |
| 891.1536 | 2790.6  | 4.32  |
| 892.1857 | 1749.3  | 2.71  |
| 893.1694 | 2228.9  | 3.45  |
| 894.23   | 1707.8  | 2.65  |
| 894.7472 | 1.5     | 0     |
| 895.2829 | 1689.8  | 2.62  |
| 896.2875 | 1106.6  | 1.71  |
| 897.135  | 2371.6  | 3.67  |
| 898.1    | 1867.4  | 2.89  |
| 899.1217 | 1599.4  | 2.48  |
| 899.6224 | 0.2     | 0     |
| 900.144  | 946     | 1.47  |
| 900.9263 | 1321.4  | 2.05  |

|          |        |      |
|----------|--------|------|
| 901.5283 | 843.1  | 1.31 |
| 902.2725 | 1003.7 | 1.55 |
| 903.1278 | 1793.9 | 2.78 |
| 903.9628 | 903.9  | 1.4  |
| 904.7822 | 1575.1 | 2.44 |
| 905.3239 | 2016.8 | 3.12 |
| 906.2326 | 2322.6 | 3.6  |
| 907.0597 | 1548.3 | 2.4  |
| 907.9791 | 2359   | 3.65 |
| 908.9337 | 4003.9 | 6.2  |
| 910.0113 | 2476.1 | 3.84 |
| 911.0497 | 2042.3 | 3.16 |
| 911.9208 | 1008.3 | 1.56 |
| 912.7022 | 1072   | 1.66 |
| 913.4834 | 1118.2 | 1.73 |
| 914.5217 | 1237.9 | 1.92 |
| 915.3645 | 1013.7 | 1.57 |
| 916.2689 | 837.1  | 1.3  |
| 917.0567 | 1301.3 | 2.02 |
| 917.8316 | 902.1  | 1.4  |
| 918.5374 | 1130.1 | 1.75 |
| 919.2553 | 1875.9 | 2.91 |
| 920.1575 | 1459.9 | 2.26 |
| 920.9486 | 1616.4 | 2.5  |
| 921.5679 | 1014.2 | 1.57 |
| 922.322  | 1540.9 | 2.39 |
| 923.1246 | 1467.3 | 2.27 |
| 923.8405 | 925.5  | 1.43 |
| 924.6193 | 1172.5 | 1.82 |
| 925.3965 | 967.3  | 1.5  |
| 926.2617 | 945.9  | 1.47 |
| 927.1558 | 1271.1 | 1.97 |
| 928.0737 | 897.1  | 1.39 |
| 928.9662 | 1088.1 | 1.69 |
| 929.8849 | 872.6  | 1.35 |
| 930.4467 | 4.2    | 0.01 |
| 931.0602 | 3163.3 | 4.9  |
| 932.149  | 1927.2 | 2.99 |
| 933.0828 | 1483.7 | 2.3  |
| 933.9256 | 1088   | 1.69 |
| 934.8963 | 1641.9 | 2.54 |
| 935.7571 | 1000   | 1.55 |
| 936.7648 | 1335   | 2.07 |
| 937.6006 | 849    | 1.32 |
| 938.5641 | 1262.9 | 1.96 |
| 939.3404 | 1119.8 | 1.73 |
| 940.3054 | 1196.5 | 1.85 |
| 941.2016 | 1376.4 | 2.13 |
| 941.7096 | 0.1    | 0    |
| 942.2363 | 1074.9 | 1.67 |
| 943.1246 | 1227.9 | 1.9  |
| 944.031  | 951.2  | 1.47 |

|          |        |      |
|----------|--------|------|
| 944.9433 | 1168.3 | 1.81 |
| 945.7819 | 790.4  | 1.22 |
| 946.2976 | 0.6    | 0    |
| 946.8106 | 1499.8 | 2.32 |
| 947.6984 | 1325.6 | 2.05 |
| 948.7082 | 1402.7 | 2.17 |
| 949.6047 | 1166.7 | 1.81 |
| 950.1425 | 0      | 0    |
| 950.7    | 1523.9 | 2.36 |
| 951.5129 | 944.2  | 1.46 |
| 952.4017 | 1236.9 | 1.92 |
| 953.3634 | 1148.9 | 1.78 |
| 954.4218 | 1204.1 | 1.87 |
| 955.2581 | 1000.3 | 1.55 |
| 956.1487 | 794    | 1.23 |
| 957.0962 | 1498.9 | 2.32 |
| 958.1223 | 1141.2 | 1.77 |
| 959.0609 | 1245.1 | 1.93 |
| 959.888  | 832.2  | 1.29 |
| 960.8574 | 1172.1 | 1.82 |
| 961.819  | 893.8  | 1.38 |
| 962.8481 | 1134.8 | 1.76 |
| 963.7751 | 843.7  | 1.31 |
| 964.8789 | 1436.8 | 2.23 |
| 965.9471 | 1142.6 | 1.77 |
| 967.016  | 1353.2 | 2.1  |
| 968.0275 | 948.3  | 1.47 |
| 968.9982 | 1183.3 | 1.83 |
| 969.9738 | 833.3  | 1.29 |
| 970.8875 | 873.1  | 1.35 |
| 971.7777 | 811.4  | 1.26 |
| 972.9213 | 1403   | 2.17 |
| 973.8954 | 827.1  | 1.28 |
| 974.7574 | 969.4  | 1.5  |
| 975.5331 | 691.4  | 1.07 |
| 976.213  | 755.2  | 1.17 |
| 977.0483 | 1066.6 | 1.65 |
| 977.9271 | 862.4  | 1.34 |
| 978.8707 | 928.9  | 1.44 |
| 979.7399 | 747.4  | 1.16 |
| 980.7591 | 983.6  | 1.52 |
| 981.7657 | 929.1  | 1.44 |
| 982.8466 | 1294.5 | 2.01 |
| 983.7918 | 942.6  | 1.46 |
| 984.666  | 837.9  | 1.3  |
| 985.3523 | 690.7  | 1.07 |
| 986.3193 | 862.9  | 1.34 |
| 987.2466 | 1060.6 | 1.64 |
| 988.2732 | 909.6  | 1.41 |
| 989.0932 | 976.2  | 1.51 |
| 990.1196 | 1024.5 | 1.59 |
| 991.1184 | 1172.4 | 1.82 |

|          |        |      |
|----------|--------|------|
| 992.1055 | 865.8  | 1.34 |
| 993.0862 | 1029.7 | 1.6  |
| 994.0745 | 880.7  | 1.36 |
| 995.0462 | 1024   | 1.59 |
| 995.9921 | 730    | 1.13 |
| 996.8657 | 780.9  | 1.21 |
| 997.6835 | 636.8  | 0.99 |
| 998.4939 | 638.3  | 0.99 |
| 999.2223 | 911.6  | 1.41 |
| 1000.053 | 727.6  | 1.13 |
| 1000.874 | 826.2  | 1.28 |
| 1001.547 | 630.3  | 0.98 |
| 1002.324 | 654.9  | 1.01 |
| 1003.054 | 699.4  | 1.08 |
| 1003.786 | 528.9  | 0.82 |
| 1004.553 | 805.4  | 1.25 |
| 1005.412 | 950.2  | 1.47 |
| 1006.325 | 777.4  | 1.2  |
| 1007.124 | 854.9  | 1.32 |
| 1007.921 | 731.9  | 1.13 |
| 1008.86  | 1041.6 | 1.61 |
| 1009.948 | 959.7  | 1.49 |
| 1010.99  | 1093.8 | 1.69 |
| 1011.528 | 1.3    | 0    |
| 1012.029 | 935.9  | 1.45 |
| 1013     | 977.6  | 1.51 |
| 1014.016 | 873.5  | 1.35 |
| 1015.039 | 998.3  | 1.55 |
| 1015.985 | 640.8  | 0.99 |
| 1016.866 | 864.5  | 1.34 |
| 1017.701 | 652.5  | 1.01 |
| 1018.519 | 635.6  | 0.98 |
| 1019.294 | 814.4  | 1.26 |
| 1020.014 | 768.1  | 1.19 |
| 1020.766 | 646.1  | 1    |
| 1021.487 | 649.4  | 1.01 |
| 1022.349 | 582.2  | 0.9  |
| 1023.293 | 814    | 1.26 |
| 1024.28  | 761.3  | 1.18 |
| 1025.177 | 782    | 1.21 |
| 1026.164 | 885.3  | 1.37 |
| 1027.14  | 959.4  | 1.49 |
| 1028.084 | 712.5  | 1.1  |
| 1028.989 | 716.3  | 1.11 |
| 1029.891 | 656.3  | 1.02 |
| 1030.841 | 909.4  | 1.41 |
| 1031.867 | 821.4  | 1.27 |
| 1032.89  | 825.9  | 1.28 |
| 1033.758 | 658.6  | 1.02 |
| 1034.747 | 934.7  | 1.45 |
| 1035.541 | 688.5  | 1.07 |
| 1036.424 | 699.1  | 1.08 |

|          |       |      |
|----------|-------|------|
| 1037.235 | 572.9 | 0.89 |
| 1038.023 | 522.7 | 0.81 |
| 1038.945 | 839.6 | 1.3  |
| 1039.951 | 713.4 | 1.11 |
| 1040.964 | 757.2 | 1.17 |
| 1041.898 | 702.3 | 1.09 |
| 1042.707 | 634   | 0.98 |
| 1043.429 | 552.8 | 0.86 |
| 1044.227 | 576   | 0.89 |
| 1044.977 | 703.7 | 1.09 |
| 1045.661 | 410.8 | 0.64 |
| 1046.426 | 514.6 | 0.8  |
| 1047.145 | 587.5 | 0.91 |
| 1047.922 | 540   | 0.84 |
| 1048.699 | 598.4 | 0.93 |
| 1049.467 | 720.3 | 1.12 |
| 1050.182 | 589.4 | 0.91 |
| 1051.011 | 627.8 | 0.97 |
| 1051.75  | 488.2 | 0.76 |
| 1052.581 | 522   | 0.81 |
| 1053.283 | 548   | 0.85 |
| 1054.086 | 587   | 0.91 |
| 1054.918 | 721.7 | 1.12 |
| 1055.722 | 755.6 | 1.17 |
| 1056.685 | 788.8 | 1.22 |
| 1057.648 | 702   | 1.09 |
| 1058.642 | 701.3 | 1.09 |
| 1059.45  | 581.2 | 0.9  |
| 1060.299 | 580.3 | 0.9  |
| 1061.161 | 651.3 | 1.01 |
| 1062.143 | 768.5 | 1.19 |
| 1063.182 | 711.2 | 1.1  |
| 1064.226 | 832   | 1.29 |
| 1065.279 | 818.3 | 1.27 |
| 1066.205 | 474   | 0.73 |
| 1066.914 | 463.7 | 0.72 |
| 1067.736 | 615.2 | 0.95 |
| 1068.731 | 641.3 | 0.99 |
| 1069.519 | 573.2 | 0.89 |
| 1070.427 | 769.3 | 1.19 |
| 1071.397 | 682.9 | 1.06 |
| 1072.419 | 649.6 | 1.01 |
| 1073.273 | 815.9 | 1.26 |
| 1074.288 | 633.2 | 0.98 |
| 1075.273 | 587.4 | 0.91 |
| 1076.203 | 539.6 | 0.84 |
| 1076.991 | 484.4 | 0.75 |
| 1077.699 | 550.8 | 0.85 |
| 1078.555 | 630.2 | 0.98 |
| 1079.389 | 540.8 | 0.84 |
| 1080.342 | 680.2 | 1.05 |
| 1081.38  | 635.5 | 0.98 |

|          |       |      |
|----------|-------|------|
| 1082.296 | 596.2 | 0.92 |
| 1083.12  | 519.6 | 0.8  |
| 1083.905 | 495.4 | 0.77 |
| 1084.696 | 538.5 | 0.83 |
| 1085.418 | 486.9 | 0.75 |
| 1086.183 | 570.6 | 0.88 |
| 1087.007 | 582.4 | 0.9  |
| 1087.841 | 565.2 | 0.88 |
| 1088.742 | 579.2 | 0.9  |
| 1089.767 | 606.7 | 0.94 |
| 1090.773 | 566.9 | 0.88 |
| 1091.528 | 547.8 | 0.85 |
| 1092.266 | 528.5 | 0.82 |
| 1093.222 | 955.9 | 1.48 |
| 1094.148 | 412.4 | 0.64 |
| 1094.77  | 570.9 | 0.88 |
| 1095.709 | 650.7 | 1.01 |
| 1096.626 | 546.3 | 0.85 |
| 1097.465 | 531.7 | 0.82 |
| 1098.414 | 616.5 | 0.96 |
| 1099.35  | 594.1 | 0.92 |
| 1100.2   | 428.7 | 0.66 |
| 1100.993 | 537.9 | 0.83 |
| 1101.892 | 461.1 | 0.71 |
| 1102.828 | 608.8 | 0.94 |
| 1103.65  | 576   | 0.89 |
| 1104.472 | 486.9 | 0.75 |
| 1105.194 | 502.7 | 0.78 |
| 1106.142 | 616.7 | 0.96 |
| 1107.198 | 798   | 1.24 |
| 1108.189 | 681.7 | 1.06 |
| 1109.15  | 543.2 | 0.84 |
| 1109.983 | 420.4 | 0.65 |
| 1110.847 | 512   | 0.79 |
| 1111.64  | 454.4 | 0.7  |
| 1112.426 | 520.4 | 0.81 |
| 1113.275 | 602.5 | 0.93 |
| 1114.195 | 417.3 | 0.65 |
| 1115.072 | 466.8 | 0.72 |
| 1115.758 | 506   | 0.78 |
| 1116.552 | 582.9 | 0.9  |
| 1117.47  | 531.2 | 0.82 |
| 1118.361 | 483.4 | 0.75 |
| 1119.337 | 540   | 0.84 |
| 1120.325 | 538.6 | 0.83 |
| 1121.196 | 545.6 | 0.85 |
| 1121.918 | 470   | 0.73 |
| 1122.676 | 413.7 | 0.64 |
| 1123.543 | 378.2 | 0.59 |
| 1124.484 | 520.8 | 0.81 |
| 1125.534 | 601.6 | 0.93 |
| 1126.478 | 645   | 1    |

|                |        |      |                       |
|----------------|--------|------|-----------------------|
| 1127.414       | 532.8  | 0.83 |                       |
| 1128.217       | 444.4  | 0.69 |                       |
| 1129.082       | 454.6  | 0.7  |                       |
| 1129.936       | 461.3  | 0.71 |                       |
| 1130.707       | 437.3  | 0.68 |                       |
| 1131.562       | 466.5  | 0.72 |                       |
| 1132.276       | 407.9  | 0.63 |                       |
| 1133.214       | 680.2  | 1.05 |                       |
| 1134.174       | 618    | 0.96 |                       |
| 1134.994       | 481.3  | 0.75 |                       |
| 1135.796       | 484.7  | 0.75 |                       |
| 1136.821       | 589.3  | 0.91 |                       |
| 1137.437       | 1.7    | 0    |                       |
| 1137.95        | 680.3  | 1.05 |                       |
| 1138.645       | 0      | 0    |                       |
| 1139.166       | 601.3  | 0.93 |                       |
| 1139.772       | 5.6    | 0.01 |                       |
| 1140.307       | 520    | 0.81 |                       |
| 1141.412       | 701.4  | 1.09 |                       |
| 1142.138       | 11.4   | 0.02 |                       |
| 1142.694       | 2826.5 | 4.38 |                       |
| 1143.648       | 1912.9 | 2.96 |                       |
| 1144.196       | 0.1    | 0    |                       |
| 1144.747       | 844.9  | 1.31 |                       |
| 1145.806       | 628.3  | 0.97 |                       |
| 1146.975       | 719.2  | 1.11 |                       |
| 1147.522       | 2.7    | 0    |                       |
| 1148.216       | 579.8  | 0.9  |                       |
| 1148.928       | 0.6    | 0    |                       |
| 1149.485       | 935.2  | 1.45 |                       |
| 1150.535       | 673.2  | 1.04 |                       |
| 1151.41        | 518.3  | 0.8  |                       |
| 1152.317       | 488.8  | 0.76 |                       |
| 1152.981       | 3      | 0    |                       |
| 1153.548       | 1226.4 | 1.9  |                       |
| 1154.051       | 0      | 0    |                       |
| 1154.688       | 874.1  | 1.35 |                       |
| 1155.256       | 0.9    | 0    |                       |
| 1155.775       | 641.9  | 0.99 |                       |
| 1156.826       | 629.4  | 0.98 |                       |
| 1157.67        | 721.1  | 1.12 |                       |
| 1158.491       | 492.2  | 0.76 |                       |
| <b>1159.31</b> | 795.5  | 1.23 | desacyl-theasaponin F |
| 1160.247       | 425.1  | 0.66 |                       |
| 1161.17        | 588    | 0.91 |                       |
| 1162.057       | 383.4  | 0.59 |                       |
| 1162.75        | 424.9  | 0.66 |                       |
| 1163.497       | 461.7  | 0.72 |                       |
| 1164.172       | 332.9  | 0.52 |                       |
| 1164.939       | 567.9  | 0.88 |                       |
| 1165.636       | 440.8  | 0.68 |                       |
| 1166.494       | 381.3  | 0.59 |                       |

|                 |              |             |                                                                             |
|-----------------|--------------|-------------|-----------------------------------------------------------------------------|
| 1167.259        | 376.1        | 0.58        |                                                                             |
| 1168.071        | 374.6        | 0.58        |                                                                             |
| 1168.855        | 399.9        | 0.62        |                                                                             |
| 1169.66         | 578.8        | 0.9         |                                                                             |
| 1170.777        | 703          | 1.09        |                                                                             |
| <b>1171.709</b> | <b>776</b>   | <b>1.2</b>  | <b>C<sub>57</sub>H<sub>88</sub>O<sub>25</sub> Assamsaponin A</b>            |
| 1172.615        | 590.6        | 0.92        |                                                                             |
| 1173.462        | 487.4        | 0.76        |                                                                             |
| 1174.366        | 515.2        | 0.8         |                                                                             |
| 1175.341        | 534.2        | 0.83        |                                                                             |
| 1176.394        | 722.9        | 1.12        |                                                                             |
| 1176.945        | 1.6          | 0           |                                                                             |
| 1177.595        | 631.2        | 0.98        |                                                                             |
| 1178.547        | 481.3        | 0.75        |                                                                             |
| 1179.482        | 536.8        | 0.83        |                                                                             |
| 1180.369        | 470.6        | 0.73        |                                                                             |
| 1181.212        | 428.4        | 0.66        |                                                                             |
| 1182.072        | 442.1        | 0.68        |                                                                             |
| 1182.763        | 387.2        | 0.6         |                                                                             |
| 1183.61         | 565.5        | 0.88        |                                                                             |
| 1184.737        | 686.9        | 1.06        |                                                                             |
| 1185.777        | 535.3        | 0.83        |                                                                             |
| 1186.762        | 708.2        | 1.1         |                                                                             |
| <b>1187.644</b> | <b>611.4</b> | <b>0.95</b> | <b>C<sub>57</sub>H<sub>88</sub>O<sub>26</sub> Theasaponin E3</b>            |
| 1188.365        | 377.8        | 0.59        |                                                                             |
| <b>1189.03</b>  | <b>403.2</b> | <b>0.62</b> | <b>C<sub>57</sub>H<sub>90</sub>O<sub>26</sub> Theasaponin A<sub>1</sub></b> |
| <b>1189.833</b> | <b>424.7</b> | <b>0.66</b> | <b>C<sub>57</sub>H<sub>90</sub>O<sub>26</sub> Theasaponin A<sub>1</sub></b> |
| 1190.708        | 477.6        | 0.74        |                                                                             |
| 1191.734        | 742.6        | 1.15        |                                                                             |
| 1192.784        | 683.9        | 1.06        |                                                                             |
| 1193.94         | 624.4        | 0.97        |                                                                             |
| 1195.016        | 544.5        | 0.84        |                                                                             |
| 1195.892        | 337.7        | 0.52        |                                                                             |
| 1196.616        | 393.5        | 0.61        |                                                                             |
| 1197.387        | 490.8        | 0.76        |                                                                             |
| 1198.297        | 485.7        | 0.75        |                                                                             |
| 1199.349        | 612.3        | 0.95        |                                                                             |
| 1200.228        | 542.2        | 0.84        |                                                                             |
| 1200.977        | 597.1        | 0.93        |                                                                             |
| 1201.854        | 623.9        | 0.97        |                                                                             |
| 1202.78         | 421.6        | 0.65        |                                                                             |
| 1203.706        | 413.3        | 0.64        |                                                                             |
| 1204.597        | 790.7        | 1.22        |                                                                             |
| 1205.449        | 844.5        | 1.31        |                                                                             |
| 1206.265        | 553.9        | 0.86        |                                                                             |
| 1207.124        | 547.3        | 0.85        |                                                                             |
| 1207.919        | 459.6        | 0.71        |                                                                             |
| 1208.764        | 512.9        | 0.79        |                                                                             |
| 1209.805        | 1721.2       | 2.67        |                                                                             |
| 1210.374        | 0.9          | 0           |                                                                             |



|                 |       |      |                                                                                  |
|-----------------|-------|------|----------------------------------------------------------------------------------|
| 1210.877        | 1152  | 1.78 |                                                                                  |
| <b>1211.876</b> | 544.5 | 0.84 | C <sub>57</sub> H <sub>88</sub> O <sub>26</sub>                                  |
| 1212.82         | 502.4 | 0.78 |                                                                                  |
| 1213.708        | 574.6 | 0.89 |                                                                                  |
| 1214.652        | 441.8 | 0.68 |                                                                                  |
| <b>1215.577</b> | 471.6 | 0.73 | C <sub>57</sub> H <sub>88</sub> O <sub>25</sub> Assamsaponin E                   |
| 1216.546        | 390.1 | 0.6  | C <sub>59</sub> H <sub>92</sub> O <sub>26</sub>                                  |
| <b>1217.485</b> | 897.5 | 1.39 | C <sub>58</sub> H <sub>90</sub> O <sub>27</sub> Theasaponin F <sub>1</sub>       |
| 1218.281        | 454.2 | 0.7  |                                                                                  |
| 1218.926        | 649.2 | 1.01 |                                                                                  |
| 1219.798        | 506   | 0.78 |                                                                                  |
| 1220.713        | 491.7 | 0.76 |                                                                                  |
| 1221.641        | 700.1 | 1.08 |                                                                                  |
| 1222.509        | 703.1 | 1.09 |                                                                                  |
| 1223.442        | 528.3 | 0.82 |                                                                                  |
| 1224.354        | 433   | 0.67 |                                                                                  |
| 1225.153        | 381   | 0.59 |                                                                                  |
| 1226.012        | 422.8 | 0.66 |                                                                                  |
| 1226.779        | 317.7 | 0.49 |                                                                                  |
| 1227.536        | 359.8 | 0.56 |                                                                                  |
| 1228.343        | 292.8 | 0.45 |                                                                                  |
| <b>1229.08</b>  | 445.7 | 0.69 | Theasaponin E <sub>4</sub>                                                       |
| <b>1229.664</b> | 470   | 0.73 | Theasaponin E <sub>4</sub>                                                       |
| <b>1230.611</b> | 555.7 | 0.86 | C <sub>59</sub> H <sub>90</sub> O <sub>27</sub> <b>Theasaponin E<sub>1</sub></b> |
| <b>1231.624</b> | 680.4 | 1.05 | C <sub>59</sub> H <sub>92</sub> O <sub>27</sub> Theasaponin A <sub>2</sub>       |
| 1232.531        | 361.9 | 0.56 | C <sub>59</sub> H <sub>92</sub> O <sub>27</sub> Assamsaponin D                   |
| 1233.323        | 391.4 | 0.61 |                                                                                  |
| 1234.134        | 486.3 | 0.75 |                                                                                  |
| 1235.065        | 540.7 | 0.84 |                                                                                  |
| 1235.996        | 444.7 | 0.69 |                                                                                  |
| 1236.9          | 416.4 | 0.65 |                                                                                  |
| 1237.899        | 478.6 | 0.74 |                                                                                  |
| 1238.822        | 477.1 | 0.74 |                                                                                  |
| 1239.759        | 544.1 | 0.84 |                                                                                  |
| 1240.593        | 300.7 | 0.47 |                                                                                  |
| 1241.191        | 272.3 | 0.42 |                                                                                  |
| 1241.926        | 306.3 | 0.47 |                                                                                  |
| 1242.799        | 386.3 | 0.6  |                                                                                  |
| 1243.314        | 0     | 0    |                                                                                  |
| 1243.815        | 701.7 | 1.09 |                                                                                  |
| 1244.832        | 545.1 | 0.84 |                                                                                  |
| 1245.802        | 492.5 | 0.76 |                                                                                  |
| 1246.727        | 371.6 | 0.58 |                                                                                  |
| 1247.655        | 540.1 | 0.84 |                                                                                  |
| 1248.668        | 396.8 | 0.61 |                                                                                  |
| 1249.625        | 448.2 | 0.69 |                                                                                  |
| 1250.564        | 375.2 | 0.58 |                                                                                  |
| 1251.536        | 508.7 | 0.79 |                                                                                  |
| 1252.465        | 420.1 | 0.65 |                                                                                  |

|                 |              |             |                                                   |                             |
|-----------------|--------------|-------------|---------------------------------------------------|-----------------------------|
| <b>1253.362</b> | 416.1        | 0.64        | C <sub>59</sub> H <sub>90</sub> O <sub>27</sub>   |                             |
| 1254.397        | 437.1        | 0.68        |                                                   |                             |
| 1255.486        | 452.4        | 0.7         |                                                   |                             |
| 1256.507        | 361.3        | 0.56        |                                                   |                             |
| 1257.411        | 326          | 0.5         |                                                   |                             |
| 1258.307        | 368.6        | 0.57        |                                                   |                             |
| <b>1259.271</b> | 446.2        | 0.69        | C <sub>60</sub> H <sub>92</sub> O <sub>28</sub>   | Theasaponins F <sub>2</sub> |
| 1260.308        | 437          | 0.68        |                                                   |                             |
| 1260.914        | 2.7          | 0           |                                                   |                             |
| 1261.44         | 557.6        | 0.86        |                                                   |                             |
| 1262.475        | 566.9        | 0.88        |                                                   |                             |
| 1263.526        | 449.6        | 0.7         |                                                   |                             |
| 1264.595        | 441.5        | 0.68        |                                                   |                             |
| 1265.516        | 469.1        | 0.73        |                                                   |                             |
| 1266.56         | 505.7        | 0.78        |                                                   |                             |
| 1267.675        | 454.5        | 0.7         |                                                   |                             |
| 1268.655        | 334.6        | 0.52        |                                                   |                             |
| 1269.516        | 363          | 0.56        |                                                   |                             |
| 1270.457        | 330.8        | 0.51        |                                                   |                             |
| <b>1271.424</b> | <b>435.3</b> | <b>0.67</b> | <b>C<sub>61</sub>H<sub>92</sub>O<sub>28</sub></b> | <b>Assamsaponin B</b>       |
| 1272.42         | 345.1        | 0.53        |                                                   |                             |
| <b>1273.25</b>  | 451.5        | 0.7         | C <sub>61</sub> H <sub>94</sub> O <sub>28</sub>   | theasaponin A <sub>3</sub>  |
| <b>1273.835</b> | 0.5          | 0           | C <sub>61</sub> H <sub>94</sub> O <sub>28</sub>   | theasaponin A <sub>3</sub>  |
| 1274.353        | 525.9        | 0.81        |                                                   |                             |
| 1275.505        | 593.3        | 0.92        |                                                   |                             |
| 1276.472        | 406.3        | 0.63        |                                                   |                             |
| 1277.397        | 480          | 0.74        |                                                   |                             |
| 1278.37         | 445.1        | 0.69        |                                                   |                             |
| 1279.342        | 414.6        | 0.64        |                                                   |                             |
| 1280.412        | 372.9        | 0.58        |                                                   |                             |
| 1281.372        | 367.4        | 0.57        |                                                   |                             |
| 1282.303        | 292.2        | 0.45        |                                                   |                             |
| 1283.17         | 320.2        | 0.5         |                                                   |                             |
| 1283.878        | 190.3        | 0.29        |                                                   |                             |
| 1284.714        | 302.9        | 0.47        |                                                   |                             |
| 1285.601        | 315.5        | 0.49        |                                                   |                             |
| 1286.31         | 323.5        | 0.5         |                                                   |                             |
| 1287.233        | 397.1        | 0.62        |                                                   |                             |
| 1288.227        | 357.5        | 0.55        |                                                   |                             |
| 1289.093        | 371.9        | 0.58        |                                                   |                             |
| 1289.907        | 388.5        | 0.6         |                                                   |                             |
| 1290.871        | 393.1        | 0.61        |                                                   |                             |
| 1291.818        | 313.1        | 0.49        |                                                   |                             |
| 1292.687        | 333.9        | 0.52        |                                                   |                             |
| 1293.548        | 296.2        | 0.46        |                                                   |                             |
| 1294.487        | 327.3        | 0.51        |                                                   |                             |
| <b>1295.475</b> | 433.9        | 0.67        | C <sub>61</sub> H <sub>92</sub> O <sub>28</sub>   |                             |
| 1296.428        | 344.2        | 0.53        |                                                   |                             |
| 1297.399        | 366.1        | 0.57        |                                                   |                             |
| 1298.588        | 464.2        | 0.72        |                                                   |                             |

|          |       |      |
|----------|-------|------|
| 1299.113 | 0     | 0    |
| 1299.624 | 335.1 | 0.52 |
| 1300.558 | 415.4 | 0.64 |
| 1301.617 | 372.9 | 0.58 |
| 1302.788 | 646.5 | 1    |
| 1303.804 | 412.9 | 0.64 |
| 1304.356 | 0.8   | 0    |
| 1304.9   | 541.5 | 0.84 |
| 1305.873 | 486.9 | 0.75 |
| 1306.864 | 362   | 0.56 |
| 1307.603 | 302.2 | 0.47 |
| 1308.47  | 289.4 | 0.45 |
| 1309.192 | 276.8 | 0.43 |
| 1310.046 | 284.2 | 0.44 |
| 1310.937 | 662.9 | 1.03 |
| 1311.87  | 330.5 | 0.51 |
| 1312.647 | 210.1 | 0.33 |
| 1313.357 | 202.7 | 0.31 |
| 1313.994 | 173.6 | 0.27 |
| 1314.746 | 292.3 | 0.45 |
| 1315.589 | 260.7 | 0.4  |
| 1316.463 | 278.6 | 0.43 |
| 1317.353 | 379.4 | 0.59 |
| 1317.858 | 0     | 0    |
| 1318.362 | 463.3 | 0.72 |
| 1319.359 | 312.7 | 0.48 |
| 1320.228 | 277.2 | 0.43 |
| 1321.279 | 298.3 | 0.46 |
| 1322.17  | 181.3 | 0.28 |
| 1322.744 | 156.7 | 0.24 |
| 1323.519 | 200.9 | 0.31 |
| 1324.307 | 249.7 | 0.39 |
| 1325.061 | 239.2 | 0.37 |
| 1325.955 | 260.3 | 0.4  |
| 1326.923 | 266.2 | 0.41 |
| 1327.796 | 242.1 | 0.38 |
| 1328.737 | 260.1 | 0.4  |
| 1329.607 | 291.7 | 0.45 |
| 1330.359 | 243.4 | 0.38 |
| 1331.282 | 291.2 | 0.45 |
| 1332.14  | 243.1 | 0.38 |
| 1332.92  | 236.1 | 0.37 |
| 1333.674 | 248.4 | 0.38 |
| 1334.527 | 248.1 | 0.38 |
| 1335.494 | 337.7 | 0.52 |
| 1336.42  | 296.1 | 0.46 |
| 1337.474 | 347.6 | 0.54 |
| 1338.555 | 305.7 | 0.47 |
| 1339.574 | 233.1 | 0.36 |
| 1340.645 | 224   | 0.35 |
| 1341.578 | 242.8 | 0.38 |
| 1342.339 | 182.9 | 0.28 |

|          |       |      |
|----------|-------|------|
| 1343.088 | 213.9 | 0.33 |
| 1343.918 | 242.4 | 0.38 |
| 1344.767 | 244.7 | 0.38 |
| 1345.508 | 201   | 0.31 |
| 1346.222 | 229.6 | 0.36 |
| 1347.281 | 451.8 | 0.7  |
| 1348.33  | 332.5 | 0.52 |
| 1349.363 | 314.9 | 0.49 |
| 1350.179 | 206.7 | 0.32 |
| 1350.998 | 262.6 | 0.41 |
| 1351.849 | 273.9 | 0.42 |
| 1352.83  | 301.1 | 0.47 |
| 1353.747 | 250.1 | 0.39 |
| 1354.64  | 197   | 0.31 |
| 1355.525 | 196.5 | 0.3  |
| 1356.474 | 234.8 | 0.36 |
| 1357.338 | 224.7 | 0.35 |
| 1358.229 | 262   | 0.41 |
| 1359.145 | 230.2 | 0.36 |
| 1359.993 | 266.6 | 0.41 |
| 1361.03  | 307.6 | 0.48 |
| 1361.558 | 5.8   | 0.01 |
| 1362.065 | 248   | 0.38 |
| 1363.116 | 238.4 | 0.37 |
| 1364.232 | 258.5 | 0.4  |
| 1365.229 | 273.8 | 0.42 |
| 1365.944 | 6.8   | 0.01 |
| 1366.54  | 356.2 | 0.55 |
| 1367.506 | 297.4 | 0.46 |
| 1368.343 | 139.3 | 0.22 |
| 1368.894 | 197.3 | 0.31 |
| 1369.592 | 175.5 | 0.27 |
| 1370.319 | 154.8 | 0.24 |
| 1371.051 | 159.7 | 0.25 |
| 1371.812 | 272.3 | 0.42 |
| 1372.691 | 171.2 | 0.27 |
| 1373.549 | 190.6 | 0.3  |
| 1374.413 | 191.2 | 0.3  |
| 1375.342 | 257.3 | 0.4  |
| 1376.221 | 186.4 | 0.29 |
| 1377.38  | 343.6 | 0.53 |
| 1378.316 | 179.5 | 0.28 |
| 1379.316 | 248.8 | 0.39 |
| 1380.353 | 195.8 | 0.3  |
| 1381.306 | 228.3 | 0.35 |
| 1382.412 | 238.4 | 0.37 |
| 1383.426 | 242.7 | 0.38 |
| 1384.43  | 200.3 | 0.31 |
| 1385.391 | 185.2 | 0.29 |
| 1386.339 | 234.1 | 0.36 |
| 1387.354 | 365.4 | 0.57 |
| 1388.232 | 172.6 | 0.27 |

|          |       |      |
|----------|-------|------|
| 1388.985 | 151.7 | 0.23 |
| 1389.627 | 154   | 0.24 |
| 1390.561 | 270.6 | 0.42 |
| 1391.593 | 240.9 | 0.37 |
| 1392.441 | 196.5 | 0.3  |
| 1393.315 | 237.8 | 0.37 |
| 1394.241 | 251.6 | 0.39 |
| 1395.176 | 209.8 | 0.33 |
| 1395.94  | 128.2 | 0.2  |
| 1396.814 | 171.2 | 0.27 |
| 1397.482 | 172.3 | 0.27 |
| 1398.291 | 158.9 | 0.25 |
| 1399.265 | 222.6 | 0.34 |
| 1400.193 | 196.5 | 0.3  |
| 1401.255 | 238.2 | 0.37 |
| 1402.25  | 171.2 | 0.27 |
| 1403.272 | 241.4 | 0.37 |
| 1404.471 | 247   | 0.38 |
| 1405.553 | 215.9 | 0.33 |
| 1406.502 | 195.5 | 0.3  |
| 1407.39  | 185.1 | 0.29 |
| 1408.112 | 167.3 | 0.26 |
| 1408.773 | 213.8 | 0.33 |
| 1409.718 | 312.3 | 0.48 |
| 1410.563 | 312.9 | 0.48 |
| 1411.318 | 181.5 | 0.28 |
| 1412.102 | 206.2 | 0.32 |
| 1412.834 | 125.2 | 0.19 |
| 1413.724 | 194   | 0.3  |
| 1414.269 | 0     | 0    |
| 1414.812 | 196.4 | 0.3  |
| 1415.869 | 205.2 | 0.32 |
| 1416.752 | 150.5 | 0.23 |
| 1417.693 | 148.1 | 0.23 |
| 1418.556 | 204.8 | 0.32 |
| 1419.472 | 241.9 | 0.37 |
| 1420.444 | 279.5 | 0.43 |
| 1421.454 | 246.6 | 0.38 |
| 1422.2   | 162.6 | 0.25 |
| 1422.997 | 158.4 | 0.25 |
| 1423.748 | 208.8 | 0.32 |
| 1424.508 | 122.4 | 0.19 |
| 1425.194 | 202   | 0.31 |
| 1425.88  | 156.7 | 0.24 |
| 1426.69  | 150.9 | 0.23 |
| 1427.765 | 233.2 | 0.36 |
| 1428.686 | 165.9 | 0.26 |
| 1429.412 | 150.1 | 0.23 |
| 1430.327 | 172.8 | 0.27 |
| 1431.242 | 241   | 0.37 |
| 1432.241 | 234.3 | 0.36 |
| 1433.259 | 272.8 | 0.42 |

|          |       |      |
|----------|-------|------|
| 1433.969 | 388.9 | 0.6  |
| 1434.822 | 352.8 | 0.55 |
| 1435.563 | 229.9 | 0.36 |
| 1436.144 | 149.1 | 0.23 |
| 1436.811 | 214.4 | 0.33 |
| 1437.716 | 214.7 | 0.33 |
| 1438.61  | 183.9 | 0.28 |
| 1439.616 | 222.3 | 0.34 |
| 1440.17  | 0.6   | 0    |
| 1440.682 | 237.8 | 0.37 |
| 1441.483 | 221.8 | 0.34 |
| 1442.436 | 183.2 | 0.28 |
| 1443.222 | 183   | 0.28 |
| 1444.034 | 184.2 | 0.29 |
| 1444.87  | 177.3 | 0.27 |
| 1445.76  | 247.9 | 0.38 |
| 1446.526 | 276.8 | 0.43 |
| 1447.537 | 272.1 | 0.42 |
| 1448.69  | 270.1 | 0.42 |
| 1449.257 | 0     | 0    |
| 1449.832 | 271.9 | 0.42 |
| 1450.832 | 253.2 | 0.39 |
| 1451.861 | 264.1 | 0.41 |
| 1452.648 | 173   | 0.27 |
| 1453.572 | 263.3 | 0.41 |
| 1454.57  | 199.9 | 0.31 |
| 1455.566 | 177.1 | 0.27 |
| 1456.479 | 155.2 | 0.24 |
| 1457.552 | 285   | 0.44 |
| 1458.473 | 145.6 | 0.23 |
| 1459.413 | 154.3 | 0.24 |
| 1460.226 | 199.2 | 0.31 |
| 1460.999 | 135.1 | 0.21 |
| 1461.909 | 185   | 0.29 |
| 1462.895 | 179.6 | 0.28 |
| 1463.685 | 129.2 | 0.2  |
| 1464.654 | 210   | 0.33 |
| 1465.572 | 179.6 | 0.28 |
| 1466.403 | 158.3 | 0.25 |
| 1467.293 | 127.2 | 0.2  |
| 1467.945 | 170.3 | 0.26 |
| 1468.808 | 138.6 | 0.21 |
| 1469.773 | 194.5 | 0.3  |
| 1470.652 | 120.5 | 0.19 |
| 1471.405 | 137.6 | 0.21 |
| 1472.096 | 118.4 | 0.18 |
| 1472.895 | 123.4 | 0.19 |
| 1473.743 | 155.5 | 0.24 |
| 1474.565 | 138.4 | 0.21 |
| 1475.501 | 148.2 | 0.23 |
| 1476.438 | 214.3 | 0.33 |
| 1477.229 | 191.2 | 0.3  |

|          |       |      |
|----------|-------|------|
| 1478.164 | 224.2 | 0.35 |
| 1479.079 | 364.4 | 0.56 |
| 1479.929 | 318.7 | 0.49 |
| 1480.815 | 192.4 | 0.3  |
| 1481.659 | 212.1 | 0.33 |
| 1482.464 | 135.7 | 0.21 |
| 1483.236 | 122.5 | 0.19 |
| 1484.221 | 155.7 | 0.24 |
| 1485.201 | 195.4 | 0.3  |
| 1486.106 | 143.7 | 0.22 |
| 1487.157 | 159.9 | 0.25 |
| 1488.197 | 159.4 | 0.25 |
| 1489.029 | 144.3 | 0.22 |
| 1489.756 | 147.4 | 0.23 |
| 1490.678 | 139.4 | 0.22 |
| 1491.243 | 3.4   | 0.01 |
| 1491.798 | 402.9 | 0.62 |
| 1492.394 | 0.8   | 0    |
| 1493.004 | 485.2 | 0.75 |
| 1494.023 | 286.1 | 0.44 |
| 1494.961 | 260.4 | 0.4  |
| 1495.773 | 178.9 | 0.28 |
| 1496.625 | 151.5 | 0.23 |
| 1497.532 | 128.6 | 0.2  |
| 1498.439 | 138.9 | 0.22 |
| 1499.444 | 109.1 | 0.17 |

## SPECTRUM - MS

tea\_saponin.raw

- c ESI sid=10.00 Q1MS [500.000-1500.000]

Scan #: 2202-3114

RT: 19.62-27.74

AV: 913

aponins mixture

| m/z      | Intensity | Relative |
|----------|-----------|----------|
| 500.4942 | 276.2     | 0.23     |
| 501.1507 | 456.6     | 0.38     |
| 502.1676 | 286.9     | 0.24     |
| 503.1431 | 303.3     | 0.25     |
| 503.8186 | 40.2      | 0.03     |
| 504.4393 | 170.8     | 0.14     |
| 505.1883 | 195.2     | 0.16     |
| 506.3137 | 209.5     | 0.17     |
| 507.0981 | 163       | 0.13     |
| 507.8938 | 137.1     | 0.11     |
| 508.6771 | 220.3     | 0.18     |
| 509.3122 | 162.9     | 0.13     |
| 510.2527 | 228.1     | 0.19     |
| 511.2105 | 237.3     | 0.2      |
| 511.7611 | 5.8       | 0        |
| 512.3113 | 157.3     | 0.13     |
| 512.9642 | 246.6     | 0.2      |
| 513.7208 | 143.5     | 0.12     |
| 514.7232 | 271.5     | 0.22     |
| 515.3822 | 193.8     | 0.16     |
| 516.3614 | 45.9      | 0.04     |
| 516.9465 | 403.5     | 0.33     |
| 517.9933 | 261.9     | 0.22     |
| 519.1251 | 260.2     | 0.21     |
| 520.2141 | 190.2     | 0.16     |
| 521.0478 | 293.8     | 0.24     |
| 522.0326 | 143.6     | 0.12     |
| 523.028  | 463.7     | 0.38     |
| 523.5554 | 1.6       | 0        |
| 524.1225 | 297.7     | 0.25     |
| 525.086  | 266.2     | 0.22     |
| 525.9468 | 109.9     | 0.09     |
| 526.9488 | 279.7     | 0.23     |
| 527.9874 | 117.7     | 0.1      |
| 528.9772 | 348.7     | 0.29     |
| 529.7908 | 119.8     | 0.1      |
| 530.6435 | 278.1     | 0.23     |
| 531.2295 | 192.2     | 0.16     |
| 531.9921 | 150.5     | 0.12     |
| 532.9249 | 288.4     | 0.24     |
| 533.5741 | 90.5      | 0.07     |
| 534.373  | 148.8     | 0.12     |



|          |       |      |
|----------|-------|------|
| 535.1141 | 216.8 | 0.18 |
| 536.1769 | 193.6 | 0.16 |
| 537.1246 | 262.9 | 0.22 |
| 538.1278 | 190.3 | 0.16 |
| 539.0184 | 246.6 | 0.2  |
| 539.9017 | 137.4 | 0.11 |
| 540.8593 | 310.2 | 0.26 |
| 541.5051 | 1.3   | 0    |
| 542.0135 | 149.1 | 0.12 |
| 543.0261 | 268.9 | 0.22 |
| 543.8889 | 165   | 0.14 |
| 545.0798 | 649.3 | 0.53 |
| 545.9074 | 238.1 | 0.2  |
| 546.6357 | 260.2 | 0.21 |
| 547.2455 | 527.6 | 0.43 |
| 548.2237 | 297.3 | 0.24 |
| 549.055  | 233.4 | 0.19 |
| 549.8928 | 121.4 | 0.1  |
| 550.6055 | 150.5 | 0.12 |
| 551.2244 | 194.5 | 0.16 |
| 552.1064 | 123.4 | 0.1  |
| 552.8471 | 157.4 | 0.13 |
| 553.6573 | 140.5 | 0.12 |
| 554.5546 | 148.4 | 0.12 |
| 555.194  | 204.6 | 0.17 |
| 555.8948 | 86.4  | 0.07 |
| 556.8299 | 232.2 | 0.19 |
| 557.6026 | 79.8  | 0.07 |
| 558.2901 | 107.7 | 0.09 |
| 559.0525 | 189.1 | 0.16 |
| 559.8076 | 111.5 | 0.09 |
| 560.6345 | 184.3 | 0.15 |
| 561.3213 | 197.9 | 0.16 |
| 562.2291 | 145   | 0.12 |
| 563.1449 | 610.6 | 0.5  |
| 564.1674 | 287.5 | 0.24 |
| 565.1403 | 223.8 | 0.18 |
| 565.8266 | 0.3   | 0    |
| 566.391  | 206.8 | 0.17 |
| 567.1867 | 207   | 0.17 |
| 568.0136 | 150.3 | 0.12 |
| 568.9393 | 226.5 | 0.19 |
| 569.9251 | 160.4 | 0.13 |
| 570.5355 | 2.2   | 0    |
| 571.0632 | 398.2 | 0.33 |
| 572.0189 | 172   | 0.14 |
| 572.9456 | 273.8 | 0.23 |
| 573.9741 | 153.8 | 0.13 |
| 575.0041 | 231.2 | 0.19 |
| 575.9088 | 80.5  | 0.07 |
| 576.9192 | 294.5 | 0.24 |
| 578.034  | 160.5 | 0.13 |

|          |       |      |
|----------|-------|------|
| 578.9528 | 248.4 | 0.2  |
| 579.7592 | 134.7 | 0.11 |
| 580.5668 | 128.1 | 0.11 |
| 581.2114 | 171.2 | 0.14 |
| 581.7713 | 82    | 0.07 |
| 582.583  | 167.8 | 0.14 |
| 583.4066 | 132.3 | 0.11 |
| 584.415  | 125.1 | 0.1  |
| 585.1538 | 153.7 | 0.13 |
| 586.0763 | 151.8 | 0.12 |
| 586.9555 | 161.7 | 0.13 |
| 587.9981 | 119.6 | 0.1  |
| 589.0072 | 185.2 | 0.15 |
| 589.9866 | 89.8  | 0.07 |
| 590.9866 | 273   | 0.22 |
| 591.6361 | 143.2 | 0.12 |
| 592.7035 | 283.8 | 0.23 |
| 593.5729 | 122.7 | 0.1  |
| 594.4459 | 170.3 | 0.14 |
| 595.2314 | 144.8 | 0.12 |
| 596.2455 | 172   | 0.14 |
| 597.2712 | 182.9 | 0.15 |
| 598.268  | 136.5 | 0.11 |
| 599.1319 | 151.6 | 0.12 |
| 600.2264 | 120.1 | 0.1  |
| 601.1421 | 138.8 | 0.11 |
| 602.0697 | 79.1  | 0.07 |
| 602.8361 | 113.7 | 0.09 |
| 603.413  | 95.7  | 0.08 |
| 604.4039 | 169.2 | 0.14 |
| 605.2946 | 147   | 0.12 |
| 606.2402 | 109.5 | 0.09 |
| 606.9224 | 140.6 | 0.12 |
| 607.8567 | 98.1  | 0.08 |
| 608.9334 | 198.7 | 0.16 |
| 609.8905 | 114   | 0.09 |
| 610.809  | 161.3 | 0.13 |
| 611.443  | 65.5  | 0.05 |
| 611.9993 | 0.7   | 0    |
| 612.5231 | 168.9 | 0.14 |
| 613.3619 | 162.7 | 0.13 |
| 614.2372 | 103.2 | 0.08 |
| 615.0926 | 149.6 | 0.12 |
| 615.9824 | 85.8  | 0.07 |
| 616.9069 | 124.9 | 0.1  |
| 617.5891 | 97.8  | 0.08 |
| 618.2996 | 52.6  | 0.04 |
| 618.9742 | 138.8 | 0.11 |
| 620.0834 | 113.3 | 0.09 |
| 621.1116 | 151.3 | 0.12 |
| 622.0773 | 110.4 | 0.09 |
| 623.0343 | 116.5 | 0.1  |

|          |       |      |
|----------|-------|------|
| 623.8256 | 72    | 0.06 |
| 624.8127 | 148   | 0.12 |
| 625.8357 | 114.5 | 0.09 |
| 626.9947 | 169.9 | 0.14 |
| 627.9989 | 116.5 | 0.1  |
| 628.9724 | 154.5 | 0.13 |
| 629.9532 | 98.6  | 0.08 |
| 631.0474 | 205.4 | 0.17 |
| 631.9471 | 74    | 0.06 |
| 632.7166 | 102.1 | 0.08 |
| 633.3916 | 127.1 | 0.1  |
| 634.5712 | 187.6 | 0.15 |
| 635.4085 | 108.4 | 0.09 |
| 636.2743 | 108.8 | 0.09 |
| 637.1997 | 176.7 | 0.15 |
| 638.1897 | 122.8 | 0.1  |
| 639.0666 | 164.5 | 0.14 |
| 640.1307 | 89.1  | 0.07 |
| 641.1194 | 143.4 | 0.12 |
| 642.1437 | 121.3 | 0.1  |
| 642.6606 | 0.1   | 0    |
| 643.2464 | 138.4 | 0.11 |
| 644.2722 | 180.1 | 0.15 |
| 645.0113 | 108.7 | 0.09 |
| 645.7688 | 94.5  | 0.08 |
| 646.2797 | 1.5   | 0    |
| 646.7892 | 153.7 | 0.13 |
| 647.6228 | 105.3 | 0.09 |
| 648.6445 | 127.5 | 0.1  |
| 649.5598 | 144.6 | 0.12 |
| 650.3817 | 124.8 | 0.1  |
| 651.1326 | 120   | 0.1  |
| 651.9243 | 47.3  | 0.04 |
| 652.5066 | 131.3 | 0.11 |
| 653.201  | 181.3 | 0.15 |
| 653.9342 | 159   | 0.13 |
| 654.597  | 108.5 | 0.09 |
| 655.2689 | 100.7 | 0.08 |
| 656.1325 | 111.5 | 0.09 |
| 656.8849 | 141.7 | 0.12 |
| 657.8505 | 118.8 | 0.1  |
| 659.0014 | 146.8 | 0.12 |
| 660.0631 | 104.5 | 0.09 |
| 661.0375 | 171.5 | 0.14 |
| 662.1391 | 208.8 | 0.17 |
| 663.1733 | 201.7 | 0.17 |
| 663.8172 | 3     | 0    |
| 664.3818 | 191.4 | 0.16 |
| 665.3541 | 153.5 | 0.13 |
| 666.3305 | 127.8 | 0.11 |
| 667.1767 | 146.8 | 0.12 |
| 668.1738 | 93    | 0.08 |

|          |        |      |
|----------|--------|------|
| 669.0306 | 108.5  | 0.09 |
| 670.1169 | 124.6  | 0.1  |
| 671.1954 | 147.1  | 0.12 |
| 672.2189 | 107.7  | 0.09 |
| 673.095  | 159    | 0.13 |
| 673.9237 | 97.8   | 0.08 |
| 674.7299 | 150.9  | 0.12 |
| 675.5387 | 137.6  | 0.11 |
| 676.4807 | 130.1  | 0.11 |
| 677.3931 | 125.1  | 0.1  |
| 678.3992 | 93.8   | 0.08 |
| 679.328  | 133    | 0.11 |
| 680.0194 | 60.9   | 0.05 |
| 680.8069 | 128.7  | 0.11 |
| 681.592  | 97.7   | 0.08 |
| 682.3894 | 106    | 0.09 |
| 683.1933 | 115.5  | 0.1  |
| 683.9904 | 77.4   | 0.06 |
| 684.9228 | 111    | 0.09 |
| 685.9199 | 136    | 0.11 |
| 686.9826 | 145.2  | 0.12 |
| 688.1426 | 261.4  | 0.22 |
| 688.9852 | 165.4  | 0.14 |
| 690.1341 | 555.5  | 0.46 |
| 690.9117 | 270.7  | 0.22 |
| 691.4744 | 8.5    | 0.01 |
| 692.0133 | 275.4  | 0.23 |
| 692.7838 | 36     | 0.03 |
| 693.3997 | 140.6  | 0.12 |
| 694.331  | 79.3   | 0.07 |
| 695.0993 | 165.8  | 0.14 |
| 695.9581 | 111.5  | 0.09 |
| 696.7749 | 128.6  | 0.11 |
| 697.5574 | 107.3  | 0.09 |
| 698.4267 | 100.4  | 0.08 |
| 699.1112 | 108    | 0.09 |
| 700.1745 | 133.8  | 0.11 |
| 701.0202 | 126.2  | 0.1  |
| 702.2731 | 1037.4 | 0.85 |
| 703.2435 | 580    | 0.48 |
| 704.2248 | 253.5  | 0.21 |
| 705.1896 | 193.9  | 0.16 |
| 706.1562 | 208.5  | 0.17 |
| 706.9944 | 189.4  | 0.16 |
| 707.723  | 107.2  | 0.09 |
| 708.492  | 107.8  | 0.09 |
| 709.2547 | 94.6   | 0.08 |
| 709.8376 | 0.8    | 0    |
| 710.3477 | 120.5  | 0.1  |
| 711.1617 | 124.9  | 0.1  |
| 712.1183 | 90.6   | 0.07 |
| 713.1083 | 172.5  | 0.14 |

|          |        |      |
|----------|--------|------|
| 714.2067 | 364.2  | 0.3  |
| 715.0402 | 149.1  | 0.12 |
| 715.7218 | 5.8    | 0    |
| 716.3252 | 7202.2 | 5.93 |
| 717.328  | 3287.6 | 2.71 |
| 718.3663 | 863.9  | 0.71 |
| 719.309  | 311.9  | 0.26 |
| 720.1453 | 133.6  | 0.11 |
| 721.1219 | 267.5  | 0.22 |
| 722.0285 | 216.1  | 0.18 |
| 722.876  | 201.2  | 0.17 |
| 723.4406 | 1.6    | 0    |
| 723.9515 | 146.6  | 0.12 |
| 724.9296 | 137    | 0.11 |
| 725.9053 | 143.5  | 0.12 |
| 726.7305 | 135.1  | 0.11 |
| 728.302  | 1876.7 | 1.54 |
| 729.3484 | 893.1  | 0.74 |
| 730.2823 | 1061.1 | 0.87 |
| 731.0942 | 503.4  | 0.41 |
| 731.9589 | 272    | 0.22 |
| 732.8717 | 174.6  | 0.14 |
| 733.768  | 166.8  | 0.14 |
| 734.463  | 147.5  | 0.12 |
| 735.256  | 153.5  | 0.13 |
| 736.2279 | 215.2  | 0.18 |
| 737.1942 | 161.9  | 0.13 |
| 737.9781 | 112.1  | 0.09 |
| 738.7108 | 117.9  | 0.1  |
| 739.3583 | 75.8   | 0.06 |
| 740.129  | 117.2  | 0.1  |
| 740.9381 | 149.1  | 0.12 |
| 741.6405 | 2.1    | 0    |
| 742.2546 | 528.9  | 0.44 |
| 743.1711 | 246.8  | 0.2  |
| 743.9039 | 121.4  | 0.1  |
| 744.713  | 157.3  | 0.13 |
| 745.6423 | 129.6  | 0.11 |
| 746.325  | 3.7    | 0    |
| 747.212  | 829    | 0.68 |
| 748.2296 | 574.6  | 0.47 |
| 748.9906 | 325.7  | 0.27 |
| 749.7759 | 232.3  | 0.19 |
| 750.7868 | 196.7  | 0.16 |
| 751.8019 | 193.6  | 0.16 |
| 752.4192 | 183.4  | 0.15 |
| 753.3572 | 195.4  | 0.16 |
| 754.3496 | 207.3  | 0.17 |
| 755.3922 | 191.6  | 0.16 |
| 756.4    | 162.2  | 0.13 |
| 757.2543 | 127.9  | 0.11 |
| 758.199  | 157.5  | 0.13 |

|          |        |      |
|----------|--------|------|
| 759.066  | 143.5  | 0.12 |
| 759.9161 | 138.3  | 0.11 |
| 761.3459 | 3052.8 | 2.51 |
| 762.3854 | 2188   | 1.8  |
| 763.4324 | 754.6  | 0.62 |
| 764.3386 | 230.4  | 0.19 |
| 764.8711 | 156.1  | 0.13 |
| 765.7318 | 178.3  | 0.15 |
| 766.5711 | 175.6  | 0.14 |
| 767.5622 | 151.6  | 0.12 |
| 768.3612 | 160.4  | 0.13 |
| 769.143  | 101.3  | 0.08 |
| 769.9736 | 180.6  | 0.15 |
| 770.8333 | 194.1  | 0.16 |
| 771.8118 | 154.8  | 0.13 |
| 772.6915 | 176    | 0.14 |
| 773.5565 | 103.3  | 0.08 |
| 774.1381 | 426.7  | 0.35 |
| 774.8432 | 296.2  | 0.24 |
| 775.6175 | 314.5  | 0.26 |
| 776.5697 | 307.9  | 0.25 |
| 777.4446 | 199.6  | 0.16 |
| 778.4221 | 267.5  | 0.22 |
| 779.3882 | 335.9  | 0.28 |
| 780.3638 | 174.8  | 0.14 |
| 781.3295 | 161.6  | 0.13 |
| 782.1727 | 152.2  | 0.13 |
| 783.1054 | 159.4  | 0.13 |
| 784.2635 | 662.6  | 0.55 |
| 784.861  | 1.9    | 0    |
| 785.3801 | 440.8  | 0.36 |
| 786.2956 | 189.3  | 0.16 |
| 787.029  | 167.8  | 0.14 |
| 787.9141 | 172.1  | 0.14 |
| 788.8028 | 231.3  | 0.19 |
| 789.6413 | 153    | 0.13 |
| 790.6175 | 186.6  | 0.15 |
| 791.563  | 133.5  | 0.11 |
| 792.5401 | 132.4  | 0.11 |
| 793.2536 | 130.1  | 0.11 |
| 794.1246 | 114.4  | 0.09 |
| 794.916  | 182.9  | 0.15 |
| 795.9116 | 289.6  | 0.24 |
| 796.6888 | 193.1  | 0.16 |
| 797.453  | 114.6  | 0.09 |
| 798.1744 | 131.7  | 0.11 |
| 798.7775 | 133.2  | 0.11 |
| 799.5595 | 146.2  | 0.12 |
| 800.4395 | 186    | 0.15 |
| 801.3393 | 191.5  | 0.16 |
| 802.1526 | 218.7  | 0.18 |
| 803.03   | 156.3  | 0.13 |

|          |       |      |
|----------|-------|------|
| 804.104  | 331.9 | 0.27 |
| 804.6435 | 206.7 | 0.17 |
| 805.4136 | 219   | 0.18 |
| 806.3614 | 179.2 | 0.15 |
| 807.2608 | 189.5 | 0.16 |
| 808.123  | 102.1 | 0.08 |
| 808.9812 | 162.6 | 0.13 |
| 809.5914 | 63.2  | 0.05 |
| 810.3442 | 132.5 | 0.11 |
| 811.2321 | 215.3 | 0.18 |
| 812.0545 | 166.5 | 0.14 |
| 812.7924 | 144.1 | 0.12 |
| 813.4899 | 150   | 0.12 |
| 814.4222 | 239.9 | 0.2  |
| 815.2542 | 154.9 | 0.13 |
| 816.1181 | 147.4 | 0.12 |
| 817.0352 | 207.4 | 0.17 |
| 818.1813 | 127.6 | 0.11 |
| 818.8852 | 165.6 | 0.14 |
| 819.5942 | 135   | 0.11 |
| 820.4453 | 194.3 | 0.16 |
| 821.2785 | 177.3 | 0.15 |
| 822.3415 | 198.8 | 0.16 |
| 823.3318 | 153.6 | 0.13 |
| 824.3706 | 144.9 | 0.12 |
| 825.2521 | 185.5 | 0.15 |
| 826.133  | 118.6 | 0.1  |
| 826.7161 | 111.2 | 0.09 |
| 827.6746 | 158   | 0.13 |
| 828.432  | 64.5  | 0.05 |
| 829.0004 | 222   | 0.18 |
| 829.5106 | 0.5   | 0    |
| 830.0595 | 405.6 | 0.33 |
| 830.9    | 278.8 | 0.23 |
| 831.7568 | 184.2 | 0.15 |
| 832.7067 | 183.8 | 0.15 |
| 833.6049 | 128.6 | 0.11 |
| 834.5061 | 129.1 | 0.11 |
| 835.1913 | 123.8 | 0.1  |
| 835.8571 | 133.4 | 0.11 |
| 836.6752 | 135.2 | 0.11 |
| 837.4828 | 136   | 0.11 |
| 838.2141 | 110   | 0.09 |
| 838.8641 | 121.9 | 0.1  |
| 839.5651 | 132.5 | 0.11 |
| 840.408  | 100.5 | 0.08 |
| 841.0682 | 113.5 | 0.09 |
| 841.8933 | 146.5 | 0.12 |
| 842.5236 | 171.7 | 0.14 |
| 843.471  | 166.9 | 0.14 |
| 844.3285 | 143.9 | 0.12 |
| 845.1674 | 204.1 | 0.17 |

|          |       |      |
|----------|-------|------|
| 845.8609 | 153.9 | 0.13 |
| 846.8128 | 295.1 | 0.24 |
| 847.9309 | 175.3 | 0.14 |
| 848.8949 | 132.9 | 0.11 |
| 849.7879 | 161.9 | 0.13 |
| 850.5074 | 178.3 | 0.15 |
| 851.4469 | 195.8 | 0.16 |
| 852.2654 | 240.6 | 0.2  |
| 853.2229 | 198.4 | 0.16 |
| 854.0783 | 116.2 | 0.1  |
| 854.9287 | 139.9 | 0.12 |
| 855.4921 | 86.1  | 0.07 |
| 856.2887 | 124.7 | 0.1  |
| 857.2262 | 177.7 | 0.15 |
| 858.3327 | 179   | 0.15 |
| 859.2682 | 128   | 0.11 |
| 860.0884 | 79.4  | 0.07 |
| 860.7412 | 107.3 | 0.09 |
| 861.4348 | 82.1  | 0.07 |
| 862.2253 | 159.4 | 0.13 |
| 863.2159 | 184   | 0.15 |
| 864.1189 | 159.3 | 0.13 |
| 865.1742 | 168.7 | 0.14 |
| 866.0742 | 127.6 | 0.11 |
| 867.1261 | 134.9 | 0.11 |
| 868.0978 | 168.4 | 0.14 |
| 869.1802 | 174   | 0.14 |
| 870.1641 | 158.5 | 0.13 |
| 871.1537 | 143   | 0.12 |
| 872.2176 | 169.3 | 0.14 |
| 873.156  | 174.7 | 0.14 |
| 874.1386 | 122.8 | 0.1  |
| 875.1606 | 259.6 | 0.21 |
| 876.1871 | 155.9 | 0.13 |
| 877.1253 | 203.5 | 0.17 |
| 878.1825 | 160.5 | 0.13 |
| 879.2554 | 257.2 | 0.21 |
| 880.2457 | 251.2 | 0.21 |
| 881.2632 | 206.1 | 0.17 |
| 881.9689 | 154.7 | 0.13 |
| 882.969  | 251.1 | 0.21 |
| 883.5871 | 7.5   | 0.01 |
| 884.2261 | 164.6 | 0.14 |
| 885.0269 | 172.8 | 0.14 |
| 885.8226 | 100.9 | 0.08 |
| 886.4682 | 118   | 0.1  |
| 887.2632 | 134.5 | 0.11 |
| 887.9802 | 99.6  | 0.08 |
| 888.5652 | 82.6  | 0.07 |
| 889.2705 | 84.8  | 0.07 |
| 890.1328 | 96.7  | 0.08 |
| 891.049  | 123.3 | 0.1  |



|          |       |      |
|----------|-------|------|
| 891.8691 | 108.2 | 0.09 |
| 892.8897 | 173.5 | 0.14 |
| 893.8597 | 118.3 | 0.1  |
| 894.8666 | 165.4 | 0.14 |
| 895.3678 | 0     | 0    |
| 895.8739 | 135.4 | 0.11 |
| 896.8157 | 100.7 | 0.08 |
| 897.5845 | 143.1 | 0.12 |
| 898.5128 | 130.4 | 0.11 |
| 899.3653 | 99.9  | 0.08 |
| 900.2828 | 102   | 0.08 |
| 901.2212 | 114.2 | 0.09 |
| 902.0271 | 100.5 | 0.08 |
| 902.9886 | 119.9 | 0.1  |
| 903.9392 | 138.2 | 0.11 |
| 905.0032 | 124.5 | 0.1  |
| 906.0048 | 219.9 | 0.18 |
| 906.8552 | 254   | 0.21 |
| 907.9148 | 378.7 | 0.31 |
| 908.525  | 445.1 | 0.37 |
| 909.3125 | 263.9 | 0.22 |
| 910.2552 | 222.5 | 0.18 |
| 911.2    | 173.4 | 0.14 |
| 912.3406 | 165.5 | 0.14 |
| 913.407  | 174.2 | 0.14 |
| 914.2839 | 140.7 | 0.12 |
| 915.188  | 148.5 | 0.12 |
| 915.9932 | 93.3  | 0.08 |
| 916.7264 | 81.6  | 0.07 |
| 917.4676 | 126.2 | 0.1  |
| 918.2065 | 93.8  | 0.08 |
| 919.3086 | 143.5 | 0.12 |
| 920.1043 | 159.4 | 0.13 |
| 921.1868 | 330.5 | 0.27 |
| 922.0352 | 328.1 | 0.27 |
| 922.6588 | 166.7 | 0.14 |
| 923.5215 | 195.9 | 0.16 |
| 924.2756 | 151   | 0.12 |
| 925.0759 | 132.2 | 0.11 |
| 925.9668 | 148.4 | 0.12 |
| 927.0615 | 183.7 | 0.15 |
| 928.1937 | 118.7 | 0.1  |
| 929.0012 | 114.5 | 0.09 |
| 929.7979 | 144   | 0.12 |
| 930.6267 | 102.7 | 0.08 |
| 931.4555 | 126.3 | 0.1  |
| 932.3262 | 91    | 0.07 |
| 933.0844 | 120   | 0.1  |
| 933.9866 | 124.2 | 0.1  |
| 934.7369 | 63    | 0.05 |
| 935.2711 | 707.9 | 0.58 |
| 936.3203 | 426.1 | 0.35 |

|          |         |       |
|----------|---------|-------|
| 937.2577 | 3605    | 2.97  |
| 938.3182 | 1904.6  | 1.57  |
| 938.8321 | 0.4     | 0     |
| 939.3889 | 740.5   | 0.61  |
| 940.4635 | 318.5   | 0.26  |
| 941.3129 | 182.2   | 0.15  |
| 942.1077 | 59.1    | 0.05  |
| 942.7339 | 107.9   | 0.09  |
| 943.511  | 151.4   | 0.12  |
| 944.3749 | 106.7   | 0.09  |
| 945.2775 | 159.9   | 0.13  |
| 946.3272 | 138.7   | 0.11  |
| 947.2518 | 118.3   | 0.1   |
| 948.0191 | 145.3   | 0.12  |
| 948.8712 | 126.3   | 0.1   |
| 949.666  | 126.5   | 0.1   |
| 950.4507 | 27.5    | 0.02  |
| 951.0177 | 323     | 0.27  |
| 951.5834 | 204.1   | 0.17  |
| 952.2683 | 233.8   | 0.19  |
| 953.1001 | 244.8   | 0.2   |
| 953.782  | 169.7   | 0.14  |
| 954.5452 | 137.1   | 0.11  |
| 955.4336 | 193.8   | 0.16  |
| 956.4118 | 122.3   | 0.1   |
| 957.3339 | 142.9   | 0.12  |
| 958.1699 | 159.6   | 0.13  |
| 958.8621 | 19.7    | 0.02  |
| 959.369  | 221.4   | 0.18  |
| 960.2121 | 148.6   | 0.12  |
| 961.1916 | 89.4    | 0.07  |
| 962.1808 | 127.7   | 0.11  |
| 963.0891 | 140.3   | 0.12  |
| 963.9623 | 90.3    | 0.07  |
| 964.6279 | 87.7    | 0.07  |
| 965.3451 | 1243.8  | 1.02  |
| 966.3236 | 649.8   | 0.53  |
| 967.2139 | 439.4   | 0.36  |
| 968.1745 | 216.6   | 0.18  |
| 969.1253 | 194.9   | 0.16  |
| 970.0894 | 180.2   | 0.15  |
| 971.1432 | 303.8   | 0.25  |
| 972.014  | 192.2   | 0.16  |
| 972.6248 | 5.5     | 0     |
| 973.1551 | 451.8   | 0.37  |
| 974.1347 | 308     | 0.25  |
| 975.1747 | 235.9   | 0.19  |
| 976.1067 | 137.9   | 0.11  |
| 977.2024 | 815.5   | 0.67  |
| 978.3922 | 516.1   | 0.42  |
| 979.2903 | 13031.5 | 10.73 |
| 980.3441 | 7073.6  | 5.82  |

|          |        |      |
|----------|--------|------|
| 980.8964 | 1.4    | 0    |
| 981.4166 | 2990.7 | 2.46 |
| 982.4436 | 896.7  | 0.74 |
| 983.3001 | 582.2  | 0.48 |
| 984.2002 | 310.5  | 0.26 |
| 985.0311 | 191.6  | 0.16 |
| 985.7126 | 121.5  | 0.1  |
| 986.5904 | 186    | 0.15 |
| 987.2966 | 153.3  | 0.13 |
| 988.0271 | 133    | 0.11 |
| 988.9481 | 210.2  | 0.17 |
| 989.8897 | 180.2  | 0.15 |
| 990.7906 | 231.6  | 0.19 |
| 991.6436 | 130.2  | 0.11 |
| 992.2579 | 5.4    | 0    |
| 993.2184 | 739.6  | 0.61 |
| 994.341  | 336.9  | 0.28 |
| 995.2886 | 1052.5 | 0.87 |
| 996.2736 | 596    | 0.49 |
| 996.8194 | 1      | 0    |
| 997.3748 | 443.8  | 0.37 |
| 998.3409 | 225.7  | 0.19 |
| 999.1303 | 150.9  | 0.12 |
| 1000.023 | 208.8  | 0.17 |
| 1000.907 | 226.8  | 0.19 |
| 1001.534 | 215.6  | 0.18 |
| 1002.312 | 212.7  | 0.18 |
| 1003.225 | 331.2  | 0.27 |
| 1004.192 | 146.6  | 0.12 |
| 1005.25  | 618.8  | 0.51 |
| 1006.187 | 396    | 0.33 |
| 1007.261 | 489.8  | 0.4  |
| 1008.281 | 296    | 0.24 |
| 1009.279 | 508.1  | 0.42 |
| 1010.253 | 193.7  | 0.16 |
| 1011.184 | 981.6  | 0.81 |
| 1011.915 | 185.7  | 0.15 |
| 1012.486 | 441.3  | 0.36 |
| 1013.409 | 443.9  | 0.37 |
| 1014.387 | 179.9  | 0.15 |
| 1015.239 | 1175.9 | 0.97 |
| 1016.294 | 645.3  | 0.53 |
| 1017.254 | 916.7  | 0.75 |
| 1018.392 | 417.3  | 0.34 |
| 1019.4   | 264.9  | 0.22 |
| 1019.967 | 4.4    | 0    |
| 1020.493 | 173.4  | 0.14 |
| 1021.422 | 248.7  | 0.2  |
| 1022.451 | 320.2  | 0.26 |
| 1023.374 | 543.7  | 0.45 |
| 1024.366 | 418.3  | 0.34 |
| 1025.343 | 1043.3 | 0.86 |

|          |        |      |
|----------|--------|------|
| 1026.309 | 671.4  | 0.55 |
| 1027.257 | 560.4  | 0.46 |
| 1028.202 | 280.3  | 0.23 |
| 1029.101 | 268    | 0.22 |
| 1029.94  | 157.3  | 0.13 |
| 1030.722 | 138.7  | 0.11 |
| 1031.258 | 260.6  | 0.21 |
| 1032.205 | 123.3  | 0.1  |
| 1032.891 | 304.3  | 0.25 |
| 1033.671 | 173.5  | 0.14 |
| 1034.307 | 6      | 0    |
| 1034.831 | 524.3  | 0.43 |
| 1035.66  | 260    | 0.21 |
| 1036.423 | 157.3  | 0.13 |
| 1037.249 | 604.4  | 0.5  |
| 1038.084 | 268.8  | 0.22 |
| 1038.835 | 446.6  | 0.37 |
| 1039.366 | 2754.2 | 2.27 |
| 1039.911 | 1      | 0    |
| 1040.45  | 1665.6 | 1.37 |
| 1041.361 | 2273.3 | 1.87 |
| 1042.373 | 1271.7 | 1.05 |
| 1043.331 | 909.8  | 0.75 |
| 1044.43  | 454.1  | 0.37 |
| 1045.412 | 519.8  | 0.43 |
| 1046.462 | 182.7  | 0.15 |
| 1047.232 | 1203.6 | 0.99 |
| 1048.348 | 802.2  | 0.66 |
| 1049.433 | 441.1  | 0.36 |
| 1050.084 | 13.4   | 0.01 |
| 1050.607 | 247.6  | 0.2  |
| 1051.259 | 498.7  | 0.41 |
| 1052.13  | 289    | 0.24 |
| 1053.241 | 1568.4 | 1.29 |
| 1054.252 | 923.4  | 0.76 |
| 1055.23  | 926.7  | 0.76 |
| 1056.34  | 552    | 0.45 |
| 1057.323 | 796.9  | 0.66 |
| 1058.311 | 414.6  | 0.34 |
| 1059.315 | 542    | 0.45 |
| 1060.228 | 379.5  | 0.31 |
| 1061.119 | 352.8  | 0.29 |
| 1061.8   | 263.6  | 0.22 |
| 1062.614 | 234    | 0.19 |
| 1063.325 | 317.9  | 0.26 |
| 1064.187 | 395.3  | 0.33 |
| 1065.295 | 344.8  | 0.28 |
| 1066.326 | 209.3  | 0.17 |
| 1067.322 | 1192   | 0.98 |
| 1068.392 | 524.9  | 0.43 |
| 1069.318 | 3942.8 | 3.25 |
| 1070.363 | 2278   | 1.88 |

|          |        |      |
|----------|--------|------|
| 1071.404 | 1641.2 | 1.35 |
| 1072.474 | 746.9  | 0.61 |
| 1073.472 | 560.5  | 0.46 |
| 1074.435 | 319.8  | 0.26 |
| 1075.33  | 680.7  | 0.56 |
| 1075.934 | 0      | 0    |
| 1076.455 | 558.5  | 0.46 |
| 1077.383 | 578.1  | 0.48 |
| 1078.344 | 505.9  | 0.42 |
| 1079.23  | 391    | 0.32 |
| 1080.077 | 271.4  | 0.22 |
| 1080.589 | 1.2    | 0    |
| 1081.113 | 528.7  | 0.44 |
| 1081.845 | 274.5  | 0.23 |
| 1082.566 | 12.8   | 0.01 |
| 1083.267 | 1673.7 | 1.38 |
| 1084.376 | 836.2  | 0.69 |
| 1085.316 | 2031.4 | 1.67 |
| 1086.345 | 1227.2 | 1.01 |
| 1087.377 | 1653.4 | 1.36 |
| 1088.327 | 828.4  | 0.68 |
| 1089.143 | 722.5  | 0.59 |
| 1089.935 | 550.7  | 0.45 |
| 1090.975 | 703.3  | 0.58 |
| 1092.027 | 364.5  | 0.3  |
| 1093.152 | 997.2  | 0.82 |
| 1093.76  | 1.5    | 0    |
| 1094.274 | 736.2  | 0.61 |
| 1094.863 | 0.5    | 0    |
| 1095.365 | 724.2  | 0.6  |
| 1096.247 | 165.8  | 0.14 |
| 1097.354 | 6844   | 5.63 |
| 1097.942 | 0.2    | 0    |
| 1098.48  | 4054.9 | 3.34 |
| 1099.43  | 3368.5 | 2.77 |
| 1100.405 | 1492.1 | 1.23 |
| 1101.38  | 2289.5 | 1.88 |
| 1101.937 | 0.2    | 0    |
| 1102.439 | 1167.6 | 0.96 |
| 1103.401 | 1105.6 | 0.91 |
| 1104.478 | 672.9  | 0.55 |
| 1105.35  | 1353.3 | 1.11 |
| 1106.298 | 776.5  | 0.64 |
| 1107.181 | 945.8  | 0.78 |
| 1108.126 | 629.4  | 0.52 |
| 1109.281 | 971.1  | 0.8  |
| 1110.309 | 557.7  | 0.46 |
| 1111.363 | 4557.6 | 3.75 |
| 1112.515 | 3139.4 | 2.58 |
| 1113.468 | 1574.2 | 1.3  |
| 1114.417 | 858.1  | 0.71 |
| 1115.29  | 2655.8 | 2.19 |

|          |         |       |
|----------|---------|-------|
| 1116.357 | 1641.5  | 1.35  |
| 1117.409 | 1236.7  | 1.02  |
| 1118.549 | 567.4   | 0.47  |
| 1119.576 | 675.6   | 0.56  |
| 1120.462 | 529.2   | 0.44  |
| 1121.377 | 532.5   | 0.44  |
| 1122.255 | 503.3   | 0.41  |
| 1123.237 | 560.5   | 0.46  |
| 1124.205 | 368.7   | 0.3   |
| 1125.269 | 967.2   | 0.8   |
| 1126.184 | 573.5   | 0.47  |
| 1126.833 | 1       | 0     |
| 1127.393 | 6271.5  | 5.16  |
| 1128.477 | 3759    | 3.09  |
| 1129.538 | 2364.8  | 1.95  |
| 1130.627 | 1038    | 0.85  |
| 1131.523 | 793.8   | 0.65  |
| 1132.393 | 632.2   | 0.52  |
| 1133.341 | 1274.2  | 1.05  |
| 1134.314 | 887     | 0.73  |
| 1135.146 | 1121.5  | 0.92  |
| 1135.877 | 728.7   | 0.6   |
| 1136.591 | 14.2    | 0.01  |
| 1137.158 | 1762.1  | 1.45  |
| 1137.957 | 734.9   | 0.6   |
| 1138.828 | 1081.3  | 0.89  |
| 1139.417 | 3020.1  | 2.49  |
| 1140.538 | 2388.6  | 1.97  |
| 1141.427 | 2611.6  | 2.15  |
| 1142.335 | 1800.1  | 1.48  |
| 1143.309 | 4994    | 4.11  |
| 1144.378 | 2932    | 2.41  |
| 1145.432 | 2057.2  | 1.69  |
| 1146.42  | 848.5   | 0.7   |
| 1147.338 | 2499.9  | 2.06  |
| 1148.401 | 1670.3  | 1.38  |
| 1148.982 | 0.1     | 0     |
| 1149.559 | 2042.5  | 1.68  |
| 1150.651 | 1086.8  | 0.89  |
| 1151.49  | 815     | 0.67  |
| 1152.366 | 602.5   | 0.5   |
| 1153.376 | 1695.9  | 1.4   |
| 1154.337 | 1095    | 0.9   |
| 1155.316 | 1870    | 1.54  |
| 1156.397 | 1286.5  | 1.06  |
| 1157.45  | 12614.3 | 10.38 |
| 1158.525 | 7936.1  | 6.53  |
| 1159.519 | 6995.9  | 5.76  |
| 1160.601 | 3615.9  | 2.98  |
| 1161.51  | 2803.8  | 2.31  |
| 1162.445 | 1439.4  | 1.18  |
| 1163.462 | 2530.3  | 2.08  |

|                            |                 |                |                                                      |
|----------------------------|-----------------|----------------|------------------------------------------------------|
|                            | 1164.146        | 43             | 0.04                                                 |
|                            | 1164.717        | 2513.5         | 2.07                                                 |
|                            | 1165.723        | 1334.5         | 1.1                                                  |
|                            | 1166.65         | 958.3          | 0.79                                                 |
|                            | 1167.459        | 999.7          | 0.82                                                 |
|                            | 1168.281        | 723.1          | 0.6                                                  |
|                            | 1169.233        | 1384           | 1.14                                                 |
|                            | 1170.18         | 956.3          | 0.79                                                 |
|                            | 1170.913        | 3.3            | 0                                                    |
|                            | <b>1171.432</b> | <b>25291.6</b> | <b>20.82 C57H88O25</b>                               |
| <b>Assamsaponin A</b>      | 1171.972        | 6.4            | 0.01                                                 |
|                            | 1172.536        | 16675.2        | 13.73                                                |
|                            | 1173.466        | 21998.9        | 18.11                                                |
|                            | 1174.511        | 11648.1        | 9.59                                                 |
|                            | 1175.54         | 6068.2         | 5                                                    |
|                            | 1176.608        | 2874.6         | 2.37                                                 |
|                            | 1177.518        | 1714.2         | 1.41                                                 |
|                            | 1178.091        | 5.1            | 0                                                    |
|                            | 1178.623        | 2657.9         | 2.19                                                 |
|                            | 1179.657        | 2329.6         | 1.92                                                 |
|                            | 1180.615        | 3024.5         | 2.49                                                 |
|                            | 1181.464        | 2301.7         | 1.89                                                 |
|                            | 1182.345        | 1080.6         | 0.89                                                 |
|                            | 1183.314        | 2389.8         | 1.97                                                 |
|                            | 1184.163        | 1235.2         | 1.02                                                 |
|                            | 1184.838        | 21.8           | 0.02                                                 |
|                            | 1185.473        | 19668.8        | 16.19                                                |
| <b>Theasaponin E3</b>      | 1186.532        | 11556.2        | 9.51                                                 |
|                            | <b>1187.451</b> | <b>21833.8</b> | <b>17.97 C57H88O26</b>                               |
| Theasaponin A <sub>1</sub> | 1188.567        | 11521.9        | 9.48                                                 |
|                            | <b>1189.582</b> | 8004.8         | 6.59 C <sub>57</sub> H <sub>90</sub> O <sub>26</sub> |
|                            | 1190.682        | 4325.8         | 3.56                                                 |
|                            | 1191.629        | 2604.7         | 2.14                                                 |
|                            | 1192.603        | 1678.7         | 1.38                                                 |
|                            | 1193.476        | 5602.7         | 4.61                                                 |
|                            | 1194.707        | 6811.7         | 5.61                                                 |
|                            | 1195.716        | 5619.4         | 4.63                                                 |
|                            | 1196.819        | 4377.6         | 3.6                                                  |
|                            | 1197.838        | 2958.8         | 2.44                                                 |
|                            | 1199.203        | 3975           | 3.27                                                 |
|                            | 1199.998        | 1682.2         | 1.38                                                 |
|                            | 1200.803        | 10279.7        | 8.46                                                 |
|                            | 1201.558        | 19820.6        | 16.32                                                |
|                            | 1202.606        | 13380.3        | 11.01                                                |
|                            | 1203.533        | 20680.9        | 17.02                                                |
|                            | 1204.59         | 12603.4        | 10.38                                                |
|                            | 1205.584        | 8896.5         | 7.32                                                 |
|                            | <b>1206.637</b> | 4416.8         | 3.64                                                 |
|                            | <b>1207.451</b> | 6573.1         | 5.41                                                 |
|                            | 1208.506        | 6000           | 4.94                                                 |

|                |                 |               |             |           |
|----------------|-----------------|---------------|-------------|-----------|
|                | <b>1209.436</b> | 6297.3        | 5.18        |           |
|                | 1210.453        | 4809.9        | 3.96        |           |
|                | <b>1211.494</b> | <b>4225.8</b> | <b>3.48</b> | C57H88O26 |
|                | 1212.466        | 2302.8        | 1.9         |           |
|                | 1213.447        | 5845.2        | 4.81        |           |
|                | 1214.741        | 5760.1        | 4.74        |           |
|                | <b>1215.567</b> | 24519.1       | 20.18       | C57H88O25 |
|                | 1216.667        | 17147.6       | 14.12       | C59H92O26 |
|                | <b>1217.483</b> | 26898.7       | 22.14       | C58H90O27 |
|                | 1218.551        | 17596.3       | 14.49       |           |
| Assamsaponin E | 1219.541        | 13788         | 11.35       |           |
|                | 1220.574        | 8780.3        | 7.23        |           |
| Theasaponin F1 | 1221.673        | 11124.4       | 9.16        |           |
|                | 1222.185        | 0.5           | 0           |           |
|                | 1222.694        | 6941          | 5.71        |           |
|                | 1223.543        | 11492.8       | 9.46        |           |
|                | 1224.433        | 7903.2        | 6.51        |           |
|                | 1225.239        | 7152.4        | 5.89        |           |
|                | 1225.981        | 4800.8        | 3.95        |           |
|                | 1226.87         | 4373.7        | 3.6         |           |
|                | 1227.67         | 3592.2        | 2.96        |           |
|                | 1228.543        | 2487.5        | 2.05        |           |
|                | <b>1229.526</b> | 121475.3      | 100         |           |
|                | <b>1230.598</b> | 83303.8       | 68.58       | C59H90O27 |
|                | <b>1231.55</b>  | 75239.1       | 61.94       | C59H92O27 |
|                | 1232.592        | 37127.5       | 30.56       |           |
|                | 1233.547        | 23825         | 19.61       |           |
|                | 1234.531        | 12433         | 10.24       |           |
| Theasaponin A2 | 1235.412        | 8247.7        | 6.79        |           |
|                | 1236.367        | 7561          | 6.22        |           |
|                | 1237.46         | 10388.6       | 8.55        |           |
|                | 1238.554        | 9371.8        | 7.71        |           |
|                | 1239.481        | 9432          | 7.76        |           |
|                | 1240.279        | 6926.2        | 5.7         |           |
|                | 1241.243        | 7402.5        | 6.09        |           |
|                | 1242.215        | 3948.6        | 3.25        |           |
|                | 1243.438        | 17828.2       | 14.68       |           |
|                | 1244.562        | 16886.4       | 13.9        |           |
|                | 1245.321        | 20171.9       | 16.61       |           |
|                | 1245.872        | 16068.9       | 13.23       |           |
|                | 1246.802        | 15643.4       | 12.88       |           |
|                | 1247.57         | 18680.5       | 15.38       |           |
|                | 1248.566        | 15484.1       | 12.75       |           |
|                | 1249.679        | 12139.1       | 9.99        |           |
|                | 1250.298        | 16            | 0.01        |           |
|                | 1250.954        | 12930.1       | 10.64       |           |
|                | 1251.703        | 5959.6        | 4.91        |           |
|                | 1252.582        | 18176.4       | 14.96       |           |
|                | <b>1253.304</b> | 13125.8       | 10.81       | C59H90O27 |



|                             |                 |         |       |                                                 |
|-----------------------------|-----------------|---------|-------|-------------------------------------------------|
|                             | <b>1253.983</b> | 12754   | 10.5  | C <sub>59</sub> H <sub>90</sub> O <sub>27</sub> |
|                             | 1254.989        | 15023.3 | 12.37 |                                                 |
|                             | 1255.942        | 7754.3  | 6.38  |                                                 |
|                             | 1256.809        | 4293.6  | 3.53  |                                                 |
|                             | 1257.516        | 11596.8 | 9.55  |                                                 |
|                             | 1258.554        | 8581    | 7.06  |                                                 |
|                             | <b>1259.514</b> | 63921   | 52.62 | C <sub>60</sub> H <sub>92</sub> O <sub>28</sub> |
|                             | 1260.093        | 5.7     | 0     |                                                 |
|                             | 1260.606        | 46970.5 | 38.67 |                                                 |
|                             | 1261.594        | 43923   | 36.16 |                                                 |
|                             | 1262.684        | 25294.5 | 20.82 |                                                 |
|                             | 1263.685        | 16852.4 | 13.87 |                                                 |
| Theasaponins F <sub>2</sub> | 1264.492        | 8412.1  | 6.92  |                                                 |
|                             | 1265.404        | 19955.9 | 16.43 |                                                 |
|                             | 1265.925        | 3.1     | 0     |                                                 |
|                             | 1266.58         | 16484.5 | 13.57 |                                                 |
|                             | 1267.64         | 17029.4 | 14.02 |                                                 |
|                             | 1268.621        | 15198.7 | 12.51 |                                                 |
|                             | 1269.527        | 29616.1 | 24.38 |                                                 |
|                             | 1270.595        | 16463.9 | 13.55 |                                                 |
|                             | <b>1271.525</b> | 47687.1 | 39.26 | C <sub>61</sub> H <sub>92</sub> O <sub>28</sub> |
|                             | 1272.611        | 31629.6 | 26.04 |                                                 |
|                             | <b>1273.62</b>  | 34854.6 | 28.69 | C <sub>61</sub> H <sub>94</sub> O <sub>28</sub> |
|                             | 1274.245        | 2       | 0     |                                                 |
| <b>Assamsaponin B</b>       | 1274.773        | 20262.2 | 16.68 |                                                 |
|                             | 1275.509        | 74197.4 | 61.08 |                                                 |
| theasaponin A <sub>3</sub>  | 1276.562        | 51003.6 | 41.99 |                                                 |
|                             | 1277.591        | 37993.2 | 31.28 |                                                 |
|                             | 1278.651        | 20518.2 | 16.89 |                                                 |
|                             | 1279.67         | 13742.6 | 11.31 |                                                 |
|                             | 1280.831        | 9903    | 8.15  |                                                 |
|                             | 1281.755        | 6172.7  | 5.08  |                                                 |
|                             | 1282.74         | 10188.7 | 8.39  |                                                 |
|                             | 1283.523        | 7635.5  | 6.29  |                                                 |
|                             | 1284.147        | 4558.6  | 3.75  |                                                 |
|                             | 1284.991        | 6026.4  | 4.96  |                                                 |
|                             | 1285.578        | 16711.2 | 13.76 |                                                 |
|                             | 1286.562        | 12579.4 | 10.36 |                                                 |
|                             | 1287.458        | 15050.4 | 12.39 |                                                 |
|                             | 1288.337        | 8695.6  | 7.16  |                                                 |
|                             | 1289.364        | 19387.5 | 15.96 |                                                 |
|                             | 1290.355        | 13210.3 | 10.87 |                                                 |
|                             | 1291.414        | 15224.7 | 12.53 |                                                 |
|                             | 1291.983        | 15.9    | 0.01  |                                                 |
|                             | 1292.554        | 9749.7  | 8.03  |                                                 |
|                             | 1293.516        | 9221.1  | 7.59  |                                                 |
|                             | 1294.484        | 7463.3  | 6.14  |                                                 |
|                             | <b>1295.43</b>  | 13574.9 | 11.17 | C <sub>61</sub> H <sub>92</sub> O <sub>28</sub> |
|                             | 1296.508        | 8544.4  | 7.03  |                                                 |
|                             | 1297.463        | 12131.6 | 9.99  |                                                 |

|          |         |       |
|----------|---------|-------|
| 1298.465 | 7522.8  | 6.19  |
| 1299.469 | 13974.5 | 11.5  |
| 1300.523 | 9053.4  | 7.45  |
| 1301.498 | 17743.7 | 14.61 |
| 1302.543 | 11228   | 9.24  |
| 1303.529 | 19992.2 | 16.46 |
| 1304.053 | 4.8     | 0     |
| 1304.623 | 12379.1 | 10.19 |
| 1305.531 | 47482.3 | 39.09 |
| 1306.046 | 3.1     | 0     |
| 1306.622 | 32578.9 | 26.82 |
| 1307.638 | 23557.6 | 19.39 |
| 1308.72  | 13818.7 | 11.38 |
| 1309.632 | 9622.3  | 7.92  |
| 1310.585 | 5989.6  | 4.93  |
| 1311.444 | 6144.8  | 5.06  |
| 1312.466 | 4327.9  | 3.56  |
| 1313.439 | 4606.5  | 3.79  |
| 1314.169 | 2619    | 2.16  |
| 1314.721 | 9.7     | 0.01  |
| 1315.469 | 18125.3 | 14.92 |
| 1316.62  | 11960.9 | 9.85  |
| 1317.522 | 28272.5 | 23.27 |
| 1318.606 | 18275.4 | 15.04 |
| 1319.623 | 18183.2 | 14.97 |
| 1320.667 | 10449.1 | 8.6   |
| 1321.658 | 8652.5  | 7.12  |
| 1322.748 | 6338.8  | 5.22  |
| 1323.636 | 5331.2  | 4.39  |
| 1324.611 | 3809.8  | 3.14  |
| 1325.383 | 3706    | 3.05  |
| 1326.129 | 2219.6  | 1.83  |
| 1327.046 | 2534.9  | 2.09  |
| 1327.552 | 5118.7  | 4.21  |
| 1328.549 | 4083.7  | 3.36  |
| 1329.47  | 7066.2  | 5.82  |
| 1330.44  | 3962.9  | 3.26  |
| 1331.499 | 11182.4 | 9.21  |
| 1332.638 | 7578    | 6.24  |
| 1333.593 | 8037.5  | 6.62  |
| 1334.632 | 5666.2  | 4.66  |
| 1335.581 | 5910.4  | 4.87  |
| 1336.494 | 4395    | 3.62  |
| 1337.515 | 7177.7  | 5.91  |
| 1338.558 | 4571.2  | 3.76  |
| 1339.56  | 6567.8  | 5.41  |
| 1340.618 | 4655.9  | 3.83  |
| 1341.587 | 4139.2  | 3.41  |
| 1342.525 | 1769.4  | 1.46  |
| 1343.462 | 9501.7  | 7.82  |
| 1344.065 | 8.9     | 0.01  |
| 1344.576 | 6475.7  | 5.33  |

|          |        |      |
|----------|--------|------|
| 1345.579 | 9648.9 | 7.94 |
| 1346.629 | 5267.6 | 4.34 |
| 1347.491 | 9271.4 | 7.63 |
| 1348.576 | 6623   | 5.45 |
| 1349.592 | 4943.6 | 4.07 |
| 1350.643 | 2607.3 | 2.15 |
| 1351.509 | 2960.3 | 2.44 |
| 1352.447 | 2010.2 | 1.65 |
| 1353.375 | 3190.7 | 2.63 |
| 1353.942 | 1691.8 | 1.39 |
| 1354.776 | 2405.7 | 1.98 |
| 1355.572 | 2415.1 | 1.99 |
| 1356.403 | 1340.1 | 1.1  |
| 1357.363 | 3659.9 | 3.01 |
| 1358.43  | 2233.3 | 1.84 |
| 1359.414 | 3322.2 | 2.73 |
| 1360.266 | 1412.6 | 1.16 |
| 1361.474 | 6044.3 | 4.98 |
| 1362.066 | 6.1    | 0.01 |
| 1362.698 | 3359.7 | 2.77 |
| 1363.684 | 2732.8 | 2.25 |
| 1364.562 | 1708.5 | 1.41 |
| 1365.491 | 2398.3 | 1.97 |
| 1366.651 | 2121.7 | 1.75 |
| 1367.565 | 2648.9 | 2.18 |
| 1368.618 | 1698.5 | 1.4  |
| 1369.485 | 2393.4 | 1.97 |
| 1370.463 | 2058.9 | 1.69 |
| 1370.971 | 0.2    | 0    |
| 1371.494 | 2514.7 | 2.07 |
| 1372.575 | 1785.2 | 1.47 |
| 1373.52  | 5166.5 | 4.25 |
| 1374.599 | 3837.5 | 3.16 |
| 1375.636 | 3528.4 | 2.9  |
| 1376.735 | 2261.3 | 1.86 |
| 1377.712 | 1583.6 | 1.3  |
| 1378.578 | 1104.8 | 0.91 |
| 1379.437 | 1352.3 | 1.11 |
| 1380.344 | 1157.6 | 0.95 |
| 1381.406 | 1340.9 | 1.1  |
| 1382.387 | 1018.4 | 0.84 |
| 1383.458 | 2487.8 | 2.05 |
| 1384.467 | 1578.6 | 1.3  |
| 1385.479 | 4143.1 | 3.41 |
| 1386.712 | 2854.4 | 2.35 |
| 1387.616 | 2293.7 | 1.89 |
| 1388.514 | 1825.8 | 1.5  |
| 1389.472 | 1930.2 | 1.59 |
| 1390.421 | 1217.3 | 1    |
| 1391.356 | 1537   | 1.27 |
| 1392.241 | 1072.9 | 0.88 |
| 1393.204 | 1136.4 | 0.94 |

|          |        |      |
|----------|--------|------|
| 1394.153 | 820.2  | 0.68 |
| 1394.71  | 1.2    | 0    |
| 1395.274 | 1091.3 | 0.9  |
| 1395.994 | 782.9  | 0.64 |
| 1397.003 | 1338.1 | 1.1  |
| 1397.73  | 1057.7 | 0.87 |
| 1398.481 | 740.7  | 0.61 |
| 1399.427 | 1975.8 | 1.63 |
| 1400.414 | 1127.8 | 0.93 |
| 1401.061 | 1213.5 | 1    |
| 1401.722 | 1452.3 | 1.2  |
| 1402.675 | 1278   | 1.05 |
| 1403.59  | 1177.1 | 0.97 |
| 1404.667 | 891    | 0.73 |
| 1405.574 | 1167.5 | 0.96 |
| 1406.517 | 1095.2 | 0.9  |
| 1407.533 | 1437.8 | 1.18 |
| 1408.524 | 1036.5 | 0.85 |
| 1409.083 | 0.4    | 0    |
| 1409.619 | 1071.3 | 0.88 |
| 1410.604 | 837.7  | 0.69 |
| 1411.675 | 1125.8 | 0.93 |
| 1412.715 | 696.3  | 0.57 |
| 1413.693 | 1289.7 | 1.06 |
| 1414.224 | 11.1   | 0.01 |
| 1414.81  | 1206.5 | 0.99 |
| 1415.652 | 1324.7 | 1.09 |
| 1416.424 | 783.6  | 0.65 |
| 1417.283 | 1054.5 | 0.87 |
| 1417.972 | 771.8  | 0.64 |
| 1418.836 | 753.8  | 0.62 |
| 1419.649 | 813.8  | 0.67 |
| 1420.562 | 575.5  | 0.47 |
| 1421.169 | 694.2  | 0.57 |
| 1421.872 | 805.7  | 0.66 |
| 1422.867 | 773.7  | 0.64 |
| 1423.763 | 721.4  | 0.59 |
| 1424.68  | 575.5  | 0.47 |
| 1425.511 | 658.5  | 0.54 |
| 1426.402 | 469.8  | 0.39 |
| 1427.456 | 867.1  | 0.71 |
| 1428.463 | 605.6  | 0.5  |
| 1429.476 | 936.6  | 0.77 |
| 1430.389 | 639.7  | 0.53 |
| 1431.296 | 685.1  | 0.56 |
| 1432.029 | 548.4  | 0.45 |
| 1433.005 | 796.6  | 0.66 |
| 1433.823 | 494.8  | 0.41 |
| 1434.614 | 580.2  | 0.48 |
| 1435.572 | 804.8  | 0.66 |
| 1436.394 | 430.3  | 0.35 |
| 1437.362 | 779.6  | 0.64 |

|          |       |      |
|----------|-------|------|
| 1438.346 | 706.1 | 0.58 |
| 1439.509 | 990   | 0.82 |
| 1440.19  | 310.2 | 0.26 |
| 1440.991 | 345.1 | 0.28 |
| 1441.738 | 497.7 | 0.41 |
| 1442.595 | 394.9 | 0.33 |
| 1443.516 | 484.3 | 0.4  |
| 1444.2   | 492.9 | 0.41 |
| 1445.165 | 682   | 0.56 |
| 1446.029 | 348   | 0.29 |
| 1446.906 | 460.7 | 0.38 |
| 1447.596 | 377.7 | 0.31 |
| 1448.352 | 316.2 | 0.26 |
| 1449.198 | 458.8 | 0.38 |
| 1449.978 | 468.9 | 0.39 |
| 1450.776 | 376.5 | 0.31 |
| 1451.735 | 504.9 | 0.42 |
| 1452.667 | 450   | 0.37 |
| 1453.427 | 473.8 | 0.39 |
| 1454.37  | 492.5 | 0.41 |
| 1455.399 | 355.3 | 0.29 |
| 1456.255 | 422.6 | 0.35 |
| 1456.995 | 444.1 | 0.37 |
| 1457.723 | 323.5 | 0.27 |
| 1458.521 | 353.5 | 0.29 |
| 1459.395 | 461.6 | 0.38 |
| 1460.086 | 357.5 | 0.29 |
| 1460.828 | 310.2 | 0.26 |
| 1461.646 | 478   | 0.39 |
| 1462.574 | 398.9 | 0.33 |
| 1463.691 | 545.2 | 0.45 |
| 1464.781 | 395.3 | 0.33 |
| 1465.742 | 384.7 | 0.32 |
| 1466.636 | 449.4 | 0.37 |
| 1467.58  | 610   | 0.5  |
| 1468.629 | 446.7 | 0.37 |
| 1469.587 | 425.1 | 0.35 |
| 1470.396 | 264.9 | 0.22 |
| 1471.148 | 309.8 | 0.26 |
| 1471.859 | 304.2 | 0.25 |
| 1472.687 | 341.2 | 0.28 |
| 1473.568 | 453.6 | 0.37 |
| 1474.383 | 267.7 | 0.22 |
| 1475.267 | 379   | 0.31 |
| 1475.991 | 255.9 | 0.21 |
| 1476.76  | 321.6 | 0.26 |
| 1477.587 | 292   | 0.24 |
| 1478.537 | 327.6 | 0.27 |
| 1479.607 | 397.1 | 0.33 |
| 1480.685 | 335.8 | 0.28 |
| 1481.721 | 370.1 | 0.3  |
| 1482.71  | 332.8 | 0.27 |

|          |       |      |
|----------|-------|------|
| 1483.338 | 260.6 | 0.21 |
| 1484.004 | 284.3 | 0.23 |
| 1484.777 | 306.1 | 0.25 |
| 1485.641 | 404.4 | 0.33 |
| 1486.437 | 237.8 | 0.2  |
| 1487.286 | 343.8 | 0.28 |
| 1488.353 | 291.9 | 0.24 |
| 1489.085 | 1.7   | 0    |
| 1489.62  | 409   | 0.34 |
| 1490.665 | 333.9 | 0.27 |
| 1491.41  | 319.3 | 0.26 |
| 1492.314 | 296.9 | 0.24 |
| 1493.241 | 264.9 | 0.22 |
| 1494.208 | 292.1 | 0.24 |
| 1495.019 | 253.5 | 0.21 |
| 1495.833 | 271.1 | 0.22 |
| 1496.724 | 261.8 | 0.22 |
| 1497.601 | 303.4 | 0.25 |
| 1498.62  | 303.4 | 0.25 |
| 1499.441 | 243.5 | 0.2  |
| 1499.945 | 0.2   | 0    |

**Assamsaponin A**

**Theasaponin E3**

Theasaponin A<sub>1</sub>

Assamsaponin E

Theasaponin F<sub>1</sub>

Theasaponin E<sub>4</sub>

**Theasaponin E<sub>1</sub>**

Theasaponin A<sub>2</sub>



Theasaponins F2

## **Assamsaponin B**

theasaponin A3
